# Supplementary material for: Motor Skill Retention Impairments in Parkinson’s Disease: A Systematic Review with Meta-analysis
Source: medRxiv preprint, doi:10.1101/2022.12.18.22282724, version 1 (2022-12-19)
Supplement: Supplementary materials [file 282724_file05.docx]

**Supplementary 1. Search terms.**

| **Motor learning key Terms** | **PD key terms** | **Control key terms** |
| --- | --- | --- |
| "Motor Learning" OR "Motor Sequence" OR "Motor Sequence Learning" OR "Motor Skill Learning" OR "Sensorimotor Learning" OR "Motor Control" OR "Motor Adaptation" OR "Locomotor Adaptation" OR "Visuomotor Adaptation" OR "Visuo-Motor Adaptation" OR "Motor Skill" OR "Motor Task" OR "Motor Activity" OR "Motor Function" OR "Postural Task" OR Implicit OR "Implicit Learning" OR "Implicit Motor Learning" OR Explicit OR "Explicit Learning" OR "Sequence Learning" OR "Sequential Learning" OR "Procedural Learning" OR "Serial Reaction Time" OR Skill OR Practice OR Encoding OR Learning OR "Learning Task" | "Parkinson's Disease" OR "Parkinson Disease" OR Parkinson OR PD | "Healthy Control" OR "Healthy Controls" OR "Control Group" OR "Subject Controls" OR "Control Subjects" OR "Normal Subjects" OR "Age-Matched" OR "Age-Matched Participants" OR "Older Adults" OR "Healthy Adults" OR "Healthy Older Adults" OR "Healthy Elderly" |

**Supplementary 2. The NIH Quality Assessment Tool for Observational Cohort and Cross-Sectional Studies.**

***The NIH questions***:

1. Was the research question or objective in this paper clearly stated?
2. Was the study population clearly specified and defined?
3. Was the participation rate of eligible persons at least 50%?
4. Were all the subjects selected or recruited from the same or similar populations (including the same time period)? Were inclusion and exclusion criteria for being in the study prespecified and applied uniformly to all participants?
5. Was a sample size justification, power description, or variance and effect estimates provided?
6. For the analyses in this paper, was(were) the exposure(s) of interest measured prior to the outcome(s) being measured?
7. Was the timeframe sufficient so that one could reasonably expect to see an association between exposure and outcome if it existed?
8. For exposures that can vary in amount or level, did the study examine different levels of the exposure as related to the outcome (e.g., categories of exposure, or exposure measured as a continuous variable)?
9. Were the exposure measures (independent variables) clearly defined, valid, reliable, and implemented consistently across all study participants?
10. Was the exposure(s) assessed more than once over time?
11. Were the outcome measures (dependent variables) clearly defined, valid, reliable, and implemented consistently across all study participants?
12. Were the outcome assessors blinded to the exposure status of participants?
13. Was loss to follow-up after baseline 20% or less?
14. Were key potential confounding variables measured and adjusted statistically for their impact on the relationship between exposure(s) and outcome(s)?

**Supplementary 3.** **Meta-regression analyses for motor skill retention after single practice.**

The results of meta-regression analyses investigating the influence of moderators such as methodological quality (i.e., risk of bias), disease duration (years), severity (Hoehn & Yahr) motor function (Unified Parkinson’s Disease Rating Scale -UPDRS- part III) on skill retention after single practice are presented in the table below. None of these moderators had a significant effect on skill retention.

| ***Model*** | ***Independent variable*** | ***k*** | ***df*** | ***QModel / F*** | **R2** | **ß** | ***p-value*** |
| --- | --- | --- | --- | --- | --- | --- | --- |
| ***1*** | ***Risk of Bias – study quality*** | 47 | 2 | 3.6250 | 0.06 |  | 0.1750 |
|  | 1. ***“Fair”*** | 34 |  |  |  | -0.1026 | 0.9180 |
|  | 1. ***“Good”*** | 5 |  |  |  | -0.1024 | 0.7020 |
|  | 1. ***“Poor”*** | 8 |  |  |  | -0.3981 | 0.0670 |
| ***2*** | ***DD*** | 36 | 1 | 0.1134 | 0.00 | 0.0143 | 0.7460 |
| ***3*** | ***H&Y*** | 30 | 1 | 0.9273 | 0.00 | 0.2146 | 0.3710 |
| ***4*** | ***UPDRS*** | 27 | 1 | 0.4432 | 0.00 | -0.0083 | 0.5200 |
| ***5*** | ***DD * UPDRS*** | 23 | 3-19 | 0.4784 | 0.16 |  | 0.6980 |
| ***6*** | ***H&Y * UPDRS*** | 18 | 3-14 | 0.4710 | 0.31 |  | 0.6870 |
| ***7*** | ***Motor Skill Acquisition*** | 47 | 2 | 4.7548 | 0.18 |  | 0.1190 |
|  | 1. ***No difference*** | 43 |  |  |  | -0.1834 | 0.2660 |
|  | 1. ***Favour of Control*** | 3 |  |  |  | 0.3465 | 0.2030 |
|  | 1. ***Favour of PD*** | 1 |  |  |  | -0.8772 | 0.1440 |
| **Footnotes:** **DD** = Disease duration; **H&Y** = Hoehn & Yahr score; **UPDRS** = Unified Parkinson’s Disease Rating Scale part III. | | | | | | | |

**Supplementary 4. Sensitivity analyses exploring the effect of medication.**

Sentivity analysis were conducted to explore the effect of medication status on skill retention. To this end, conditions (i.e., effect sizes) in which the PD patients were practising and/or tested while “off” medication(Hadj-Bouziane et al., 2013; Hayes and Hunsaker, 2015; Kawashima et al., 2018; Lahlou et al., 2022; Platz et al., 1998) were removed from the main meta-analyses. Removing these conditions did not change the main results of the meta-analyses, suggesting that medication status did not affect skill retention after either single or extended practice.

***Single practice***: SMD = -0.21; 95% CI = -0.38, -0.05; *p* = 0.0123; N = 41; I2 = 44.4%

***Extended practice***: SMD = -0.07; 95% CI = -0.27, 0.14; *p* = 0.5286; N = 16; I2 = 0%

**Supplementary 5. Motor skill transfer after single practice.**

**Methods**: Motor skill transfer, which is an approach to investigate motor skill retention from the perspective of generalization(Schmidt et al., 2018), was investigated by grouping studies according to the number of practice sessions performed during acquisition (single vs. extended practice). To investigate the transfer of acquired motor skills to untrained tasks, we calculated group mean differences using consecutive retention and transfer test scores (e.g., transfer score 24h – retention score 24h). This method was adopted to reduce the influence that memory reactivation may have on motor memory processes(Dudai, 2004; Tronson and Taylor, 2007). Analyses were performed following the same procedures implemented in the main meta-analyses. However, we did not perform meta-regression analyses due to the limited effect sizes available.

**Results**: Motor skill transfer was investigated in seven(Marinelli et al., 2017; Mochizuki-Kawai et al., 2010; Nackaerts et al., 2020; Platz et al., 1998; Sidaway et al., 2016; Smiley-Oyen et al., 2003; Van Ooteghem et al., 2017) and one(Smiley-Oyen et al., 2012) studies after a single session and extended motor practice, respectively. Funnel and forest plots pertaining to motor skill transfer are reported below.

**Motor skill transfer: Funnel plot.**


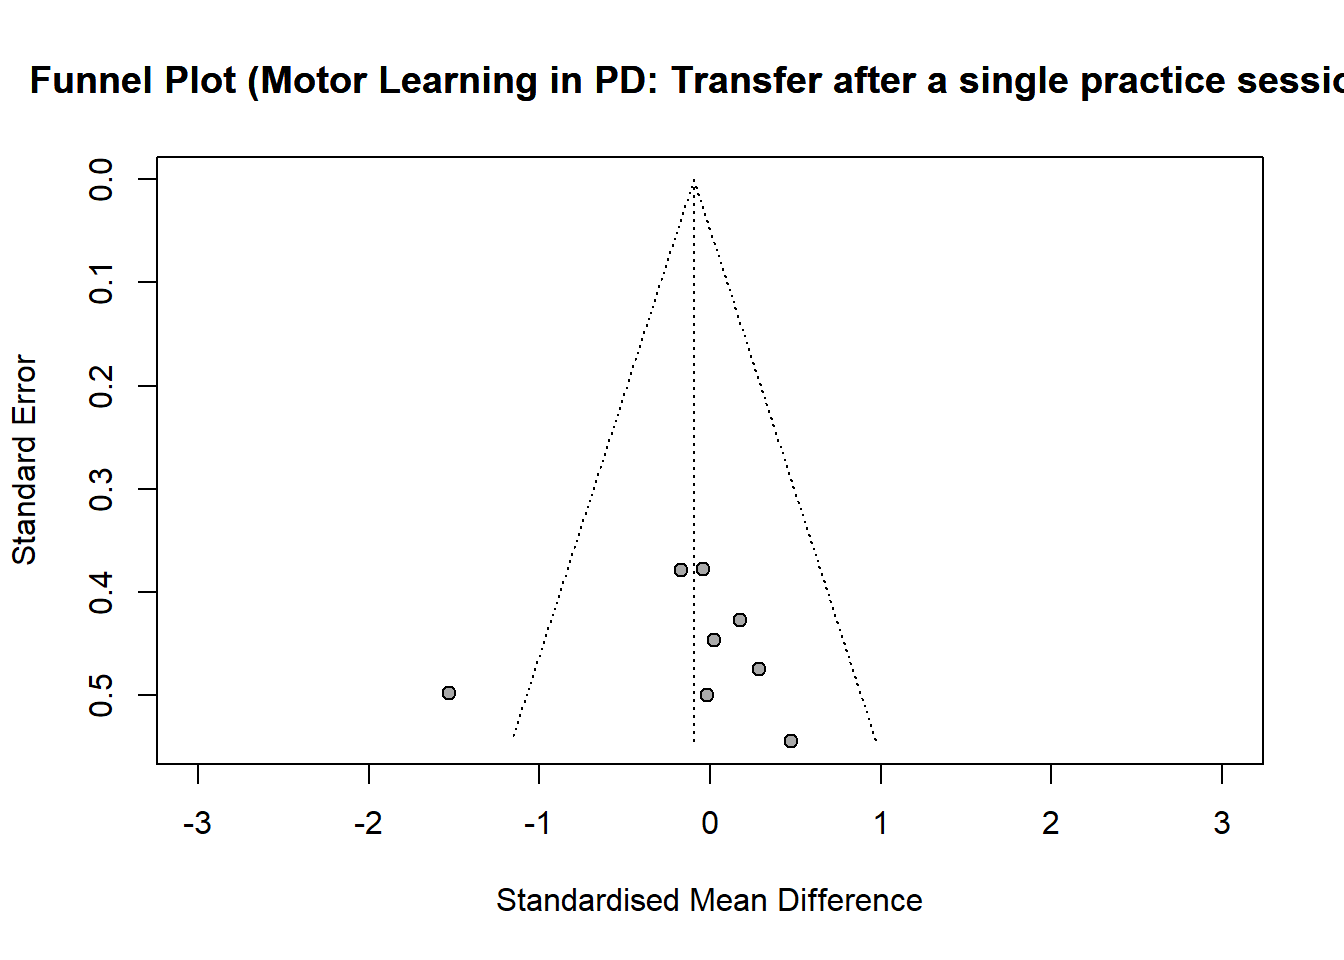


**Motor skill transfer: Forest plot.**


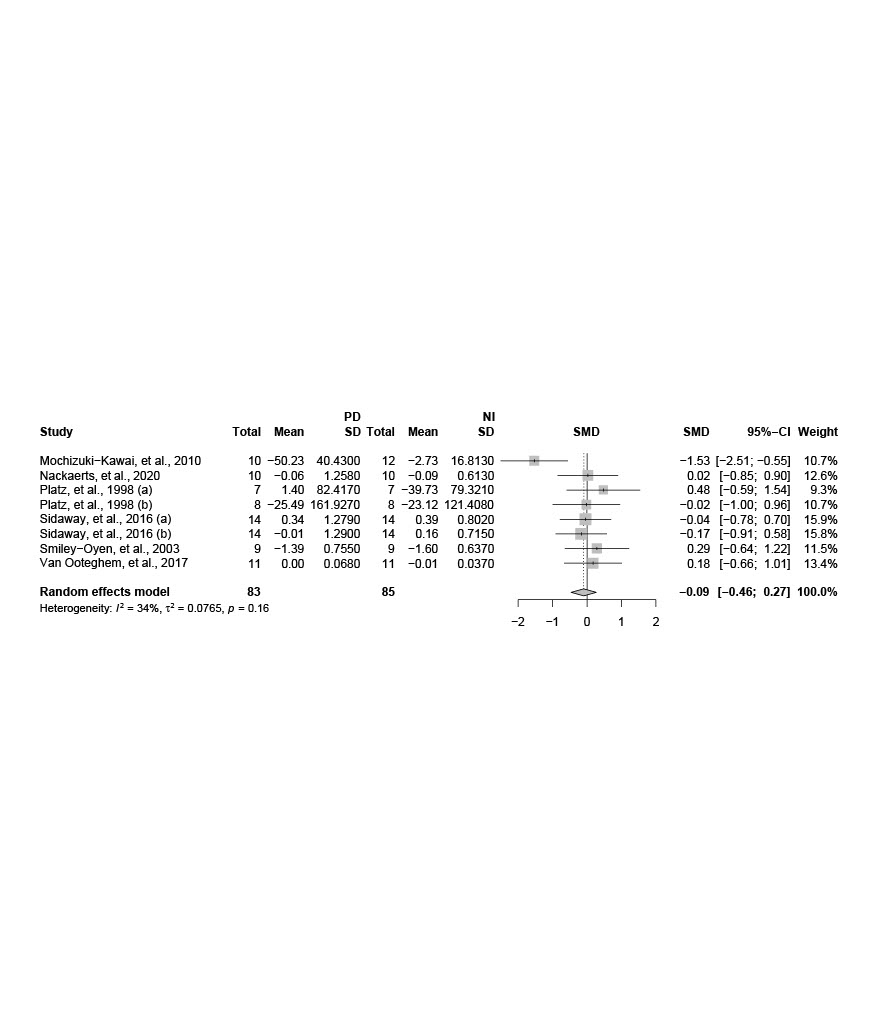


**Discussion**: Our results pertaining motor skill transfer following a single practice showed no difference between persons with the PD and NI group (SMD = -0.09; 95% CI = -0.46; 0.27; *p* = 0.6117; N = 8; I2 = 34.0%). These findings are relevant given that successful motor skill transfer would enable persons with PD to generalize and implement their motor skills in different contexts and tasks of daily living. However, our results should be considered preliminary and interpreted with caution for several reasons. First, only a limited number of effect sizes were available for the analysis (N = 8). Second, a few studies included in our review that observed motor skill transfer deficits in persons with PD(Isaias et al., 2011; Lee et al., 2016; Marinelli et al., 2017; Onla-Or and Winstein, 2008) could not be used in our analysis since it was not possible to obtain the data. For example, Isaias et al.,(Isaias et al., 2011) using a VAT, found deficits in motor skill transfer in persons with PD relative to NI individuals. Similarly, Onla-Or et al.,(Onla-Or and Winstein, 2008) observed that persons with PD have greater contextual interference than NI individuals in a SMT. Third, it is also plausible that our results were influenced by other factors such as the type of task implemented and the type of feedback provided. In addition to these considerations, previous studies have consistently observed that persons with PD have important deficits in performing acquired motor skills in new contexts and task-switching(Abbruzzese et al., 2009; Nieuwboer et al., 2009; Olson et al., 2019). Since motor skill transfer and generalization are important in PD, further research is needed to confirm and expand our preliminary results.

**Supplementary 6. Multiple effect sizes.**

It should be noted that 13 (Behrman et al., 2000; Dan et al., 2015; Harrington et al., 1990; Hayes and Hunsaker, 2015; Lahlou et al., 2022; Lee et al., 2019; Lin et al., 2007; Marinelli et al., 2009; Onla-Or and Winstein, 2008; Peterson et al., 2016; Platz et al., 1998; Sidaway et al., 2016; Smiley-Oyen et al., 2006) studies entered in the meta-analyses provided data to calculate multiple effect sizes, which were not pooled together to create a single comparison. This is because, among those studies, one used different motor tasks (Smiley-Oyen et al., 2006), three created different learning conditions by modifying either the complexity (Behrman et al., 2000; Harrington et al., 1990) or some parameters of the motor task (Peterson et al., 2016), and one study used different motor practice structures (blocked vs random) (Sidaway et al., 2016), which can alter motor learning processes (Carey et al., 2005; Chen et al., 2014; Lu et al., 2021; Schmidt et al., 2018). Furthermore, eight studies had more than two groups/experimental conditions, allocating different participants to each of them (Dan et al., 2015; Hayes and Hunsaker, 2015; Lahlou et al., 2022; Lee et al., 2019; Lin et al., 2007; Marinelli et al., 2009; Onla-Or and Winstein, 2008; Platz et al., 1998). Conversely, the retention scores of one study that used different active video games requiring similar motor and cognitive demands (Dantas et al., 2018) were pooled together to create a composite effect size.

**Supplementary 7. Flow diagram showing the flow of information through the different stages of the systematic review with meta-analysis.**


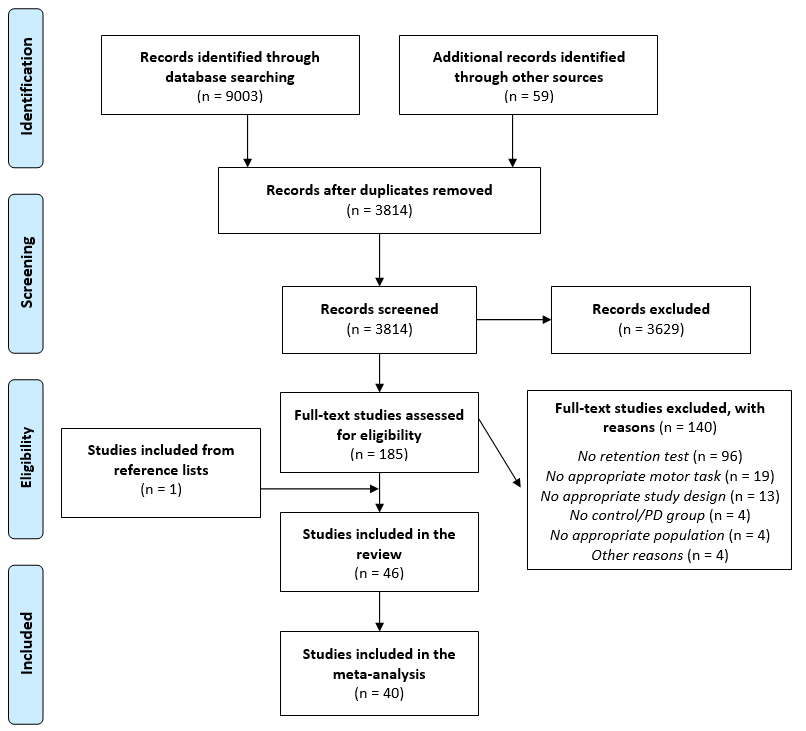


**Retention test**: Ninety-six studies were excluded because they did not have a retention test, or the latter was assessed less than one hour after the end of practice (eligibility criteria) (Abdel-Malek et al., 1988; Agostino et al., 2005; Agostino et al., 1992; Agostino et al., 1996; Alberts et al., 2000; Alberts et al., 1998; Ashoori et al., 2011; Barzgari et al., 2019; Bédard and Sanes, 2009; Beigi et al., 2016; Bondi and Kaszniak, 1991; Boonsinsukh et al., 2012; Broeder et al., 2019a; Caligiuri et al., 1992; Carbon and Eidelberg, 2006; Carbon et al., 2007; Carbon et al., 2003; Carbon et al., 2004; Carbon et al., 2010; Carey et al., 2002; Catala et al., 2016; Chen et al., 2016; Contreras-Vidal and Buch, 2003; Cressman et al., 2021; Cunnington et al., 1999; Deroost et al., 2006; Dominey et al., 1995; Dominey et al., 1997; Doyon et al., 1997; Fattapposta et al., 2000; Fernandez-Ruiz et al., 2003; Frith et al., 1986; Gamble et al., 2014; Geffe et al., 2016; Ghilardi et al., 2003; Ghilardi et al., 2007; Gobel et al., 2013; Guadagnoli et al., 2002; Heindel et al., 1989; Jackson et al., 1995a; Jackson et al., 1995b; Jordan and Sagar, 1994; Kelly et al., 2004; Kemeny et al., 2019; Kitahara et al., 2018; Krebs et al., 2001; Kwak et al., 2010, 2012; Linden et al., 1990; Lukos et al., 2010; MacAskill et al., 2002; Marinelli et al., 2010; Meissner et al., 2018, 2019; Meissner et al., 2016; Mentis et al., 2003a; Mentis et al., 2003b; Merritt et al., 2017; Messier et al., 2007; Mollion et al., 2011; Mongeon et al., 2013; Moreno Catalá et al., 2016; Nakamura et al., 2000, 2001; Nemanich and Earhart, 2015; Oates et al., 2013; Osman et al., 2008; Paquet et al., 2008; Pascual-Leone et al., 1993; Price and Shin, 2009; Rafal et al., 1987; Robertson and Flowers, 1990; Sarazin et al., 2002; Schendan et al., 2013; Smith et al., 2001; Smith and McDowall, 2006; Soliveri et al., 1992; Sprengelmeyer et al., 1995; Stefanova et al., 2000; Stephan et al., 2011; Thomas et al., 1996; Tremblay et al., 2010; Tzvi et al., 2021; van Tilborg and Hulstijn, 2010; Vandenbossche et al., 2013; Venkatakrishnan et al., 2011; Verschueren et al., 1997; Weiner et al., 1983; Werheid et al., 2003; Westwater et al., 1998; Wieczorek et al., 2011; Wilkinson et al., 2009; Wu and Hallett, 2005, 2008; Wu et al., 2015; Wu et al., 2010).

**No appropriate motor task**: Nineteen studies were excluded because they did not use an appropriate motor task/method to assess motor learning (Adam et al., 2011; Arroyo-Anll et al., 2015; Arroyo-Anllo et al., 2004; Beatty and Monson, 1990; Bellebaum et al., 2016; Chong et al., 2000; De Boer et al., 2016; DiFrancisco-Donoghue et al., 2015; Djamshidian et al., 2010; Filoteo et al., 2005; Grogan et al., 2017; Hodgson et al., 2013; Huang et al., 2017; Myers et al., 2003; Oishi et al., 2011; Oishi et al., 2010; Roncacci et al., 1996; Vakil and Herishanu-Naaman, 1998; Zokaei et al., 2020)

**No appropriate study design**: Thirteen studies used a study design that did not meet the inclusion criteria (Bello et al., 2008; Broeder et al., 2019b; Camacho et al., 2019; Chuma et al., 2006; Daum et al., 1996; dos Santos Mendes et al., 2012; Elangovan et al., 2018; Esculier et al., 2012; Flowers, 1976; Horiba et al., 2019; Lester et al., 2017; Moisello et al., 2015; Normand et al., 1993).

**No appropriate population**: Two studies used deep brain stimulation (Bédard and Sanes, 2011; Marcelino D.A. et al., 2019), one study included a control group with neurological conditions (Goldenberg et al., 1986), and another study had a control group with an age that differed significantly from the PD group (Ioffe et al., 2006).

**No control/PD group**: Four studies were excluded due to the lack of control/PD group (Adams et al., 2002; Chiviacowsky et al., 2012; Chung et al., 2020; Wu et al., 2004)

**Other reasons**: Four studies were excluded for other reasons (Bowen et al., 1973; Manuel et al., 2018; Sternad, 2015; Worringham and Stelmach, 1990) (e.g., duplicated data).

**Supplementary 8.** **NIH study quality assessment.**


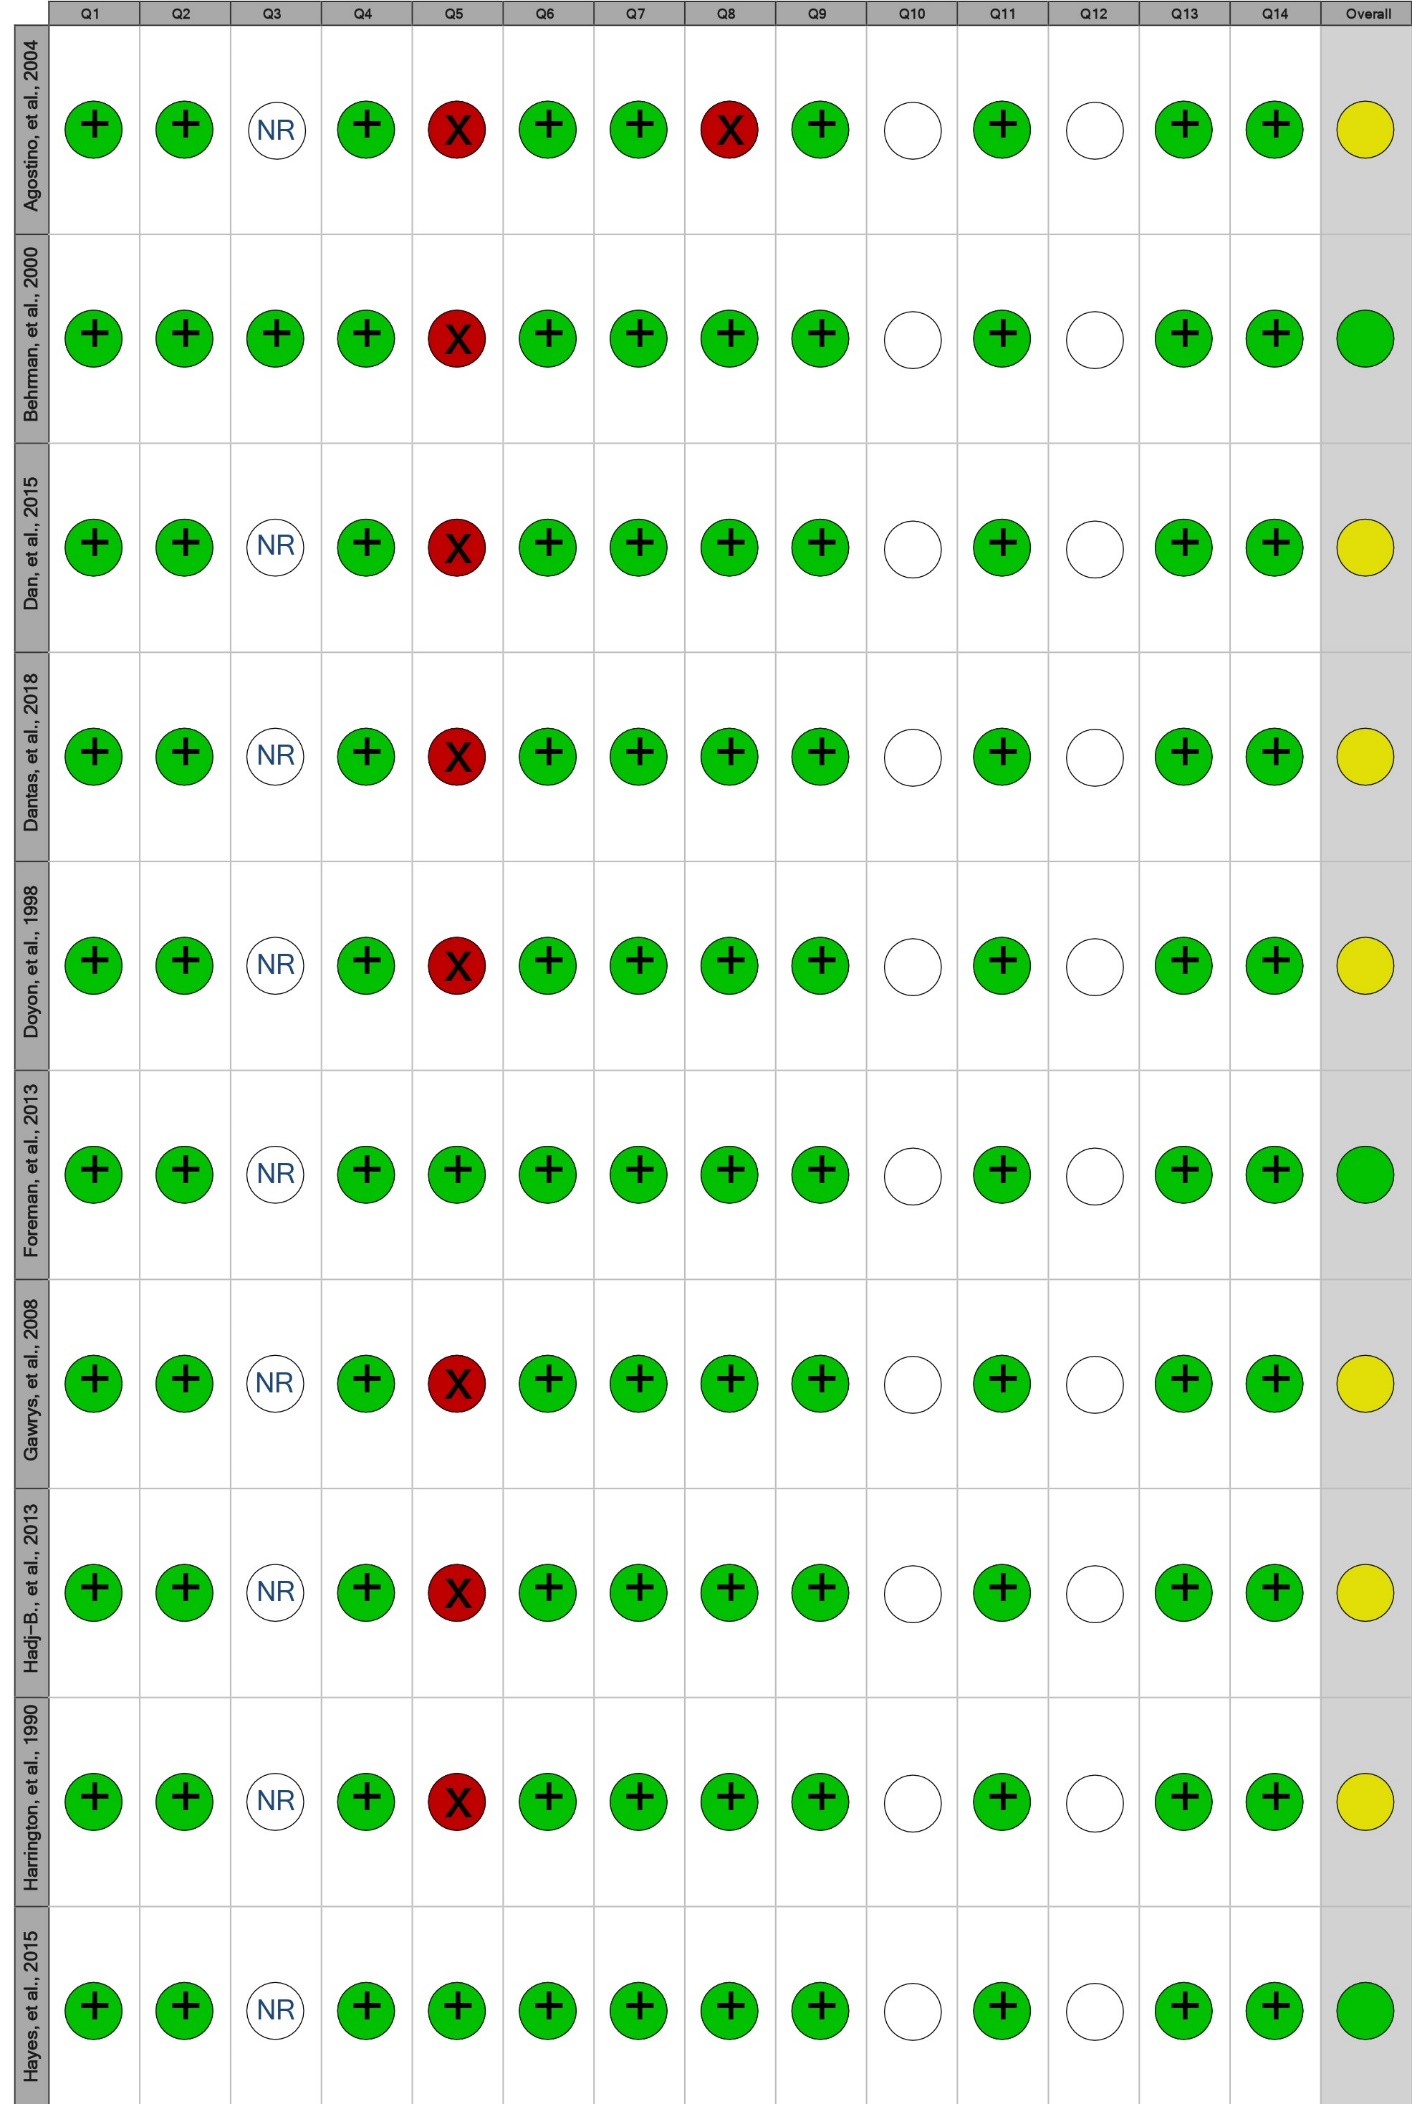


**Footnotes: • = No/Poor; • = Fair; • = Yes/Good; NR= not reported; " " = not applicable.**

**Supplementary 8.** *Continue*


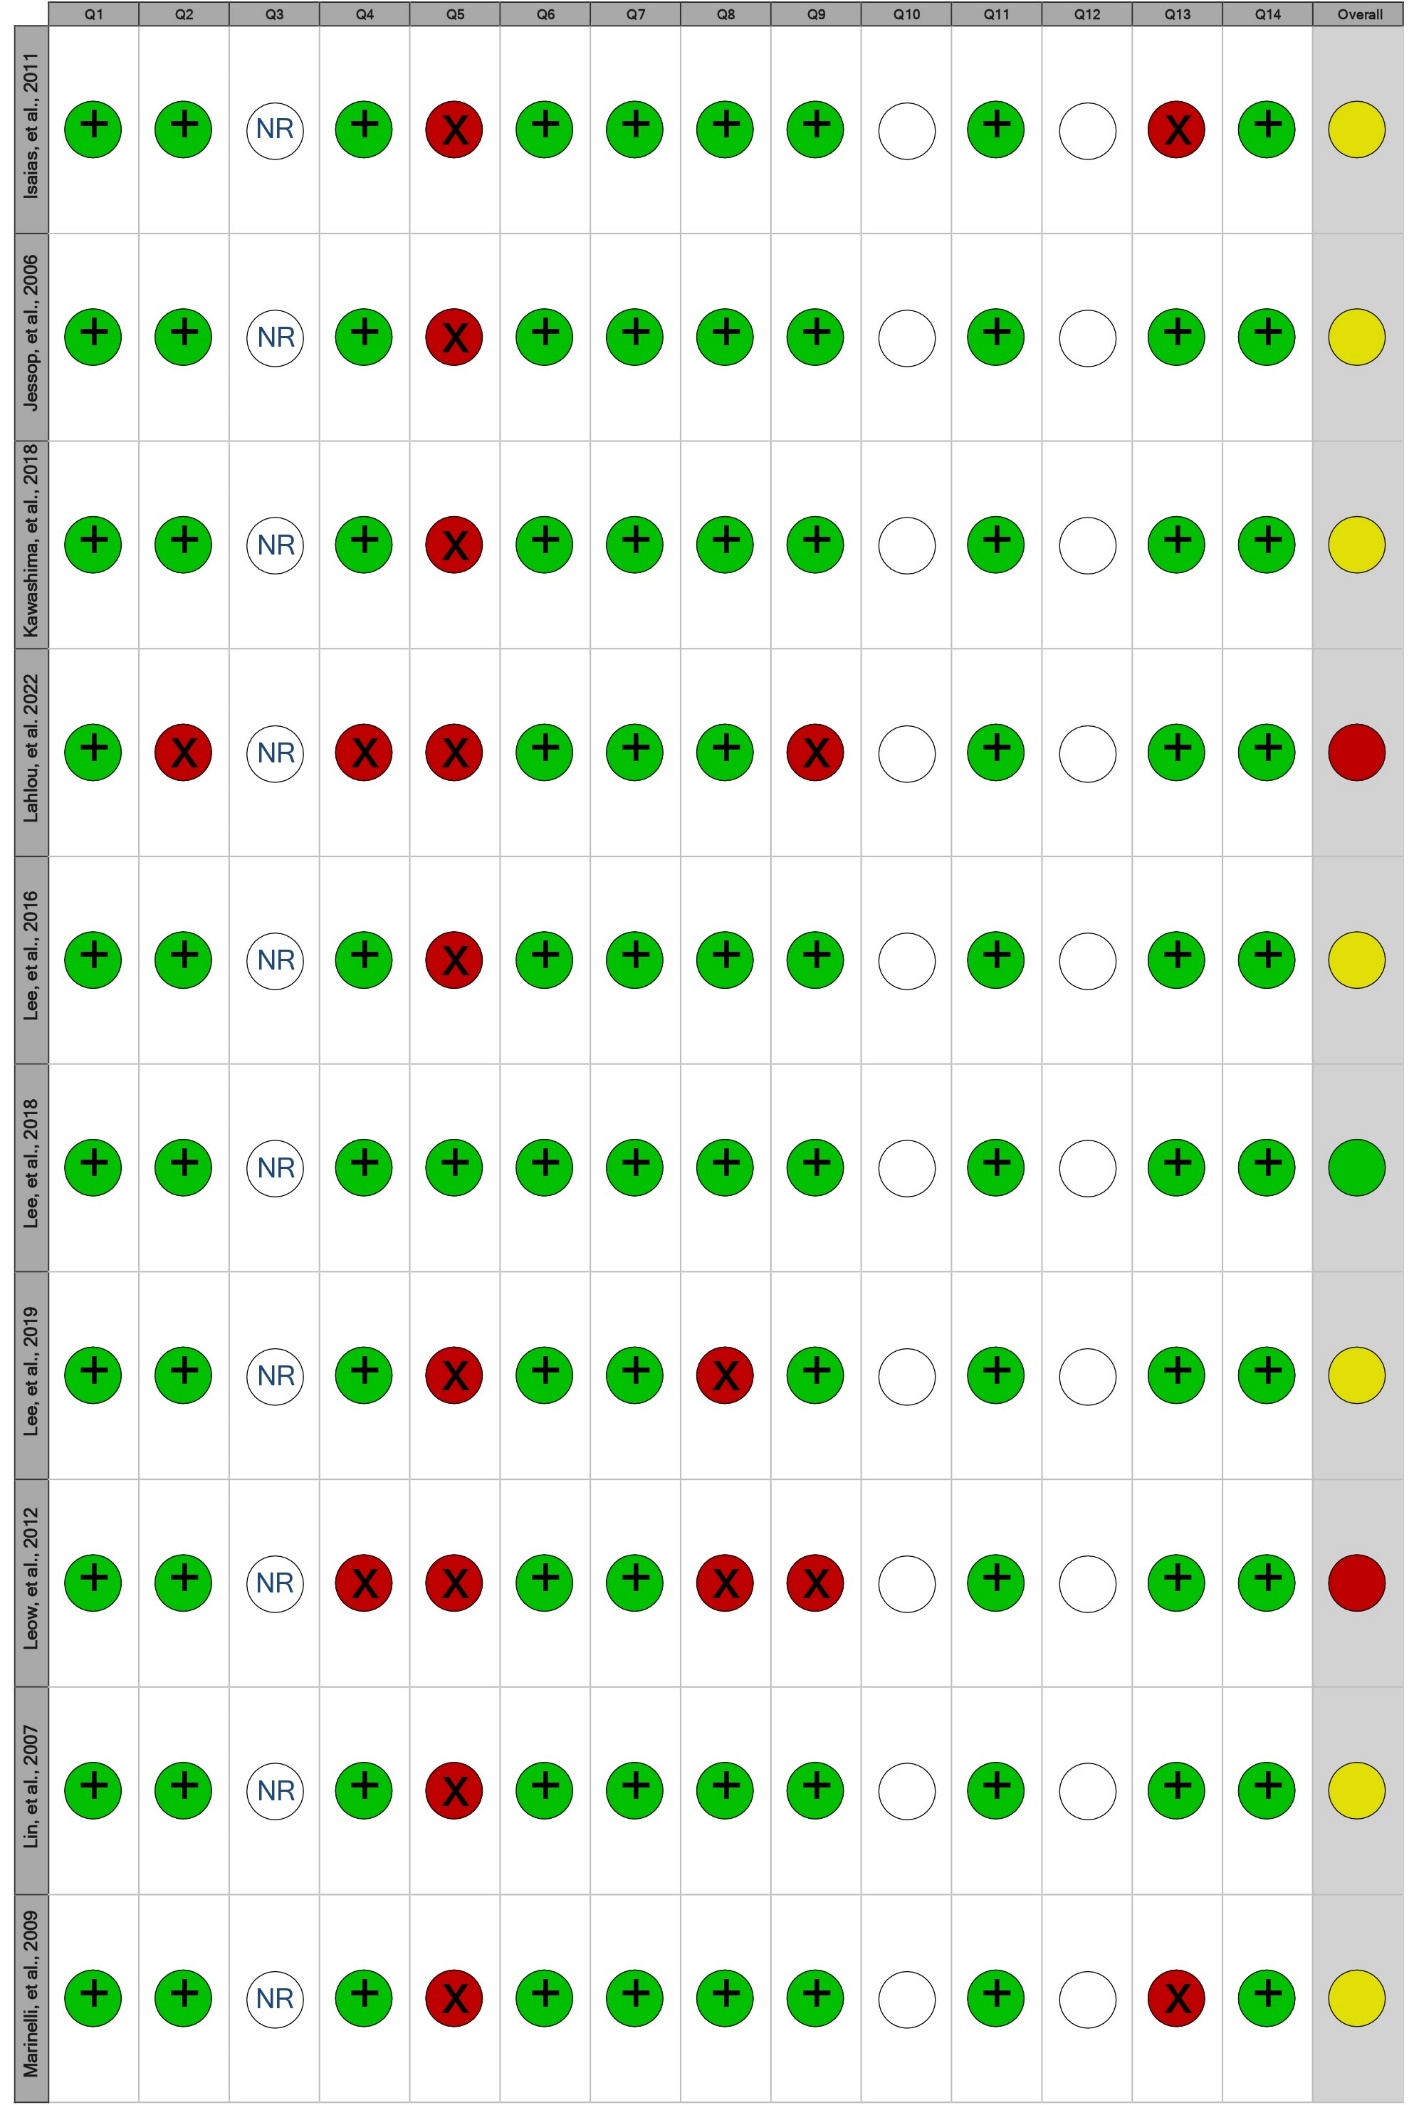


**Footnotes: • = No/Poor; • = Fair; • = Yes/Good; NR= not reported; " " = not applicable.**

**Supplementary 8.** *Continue*


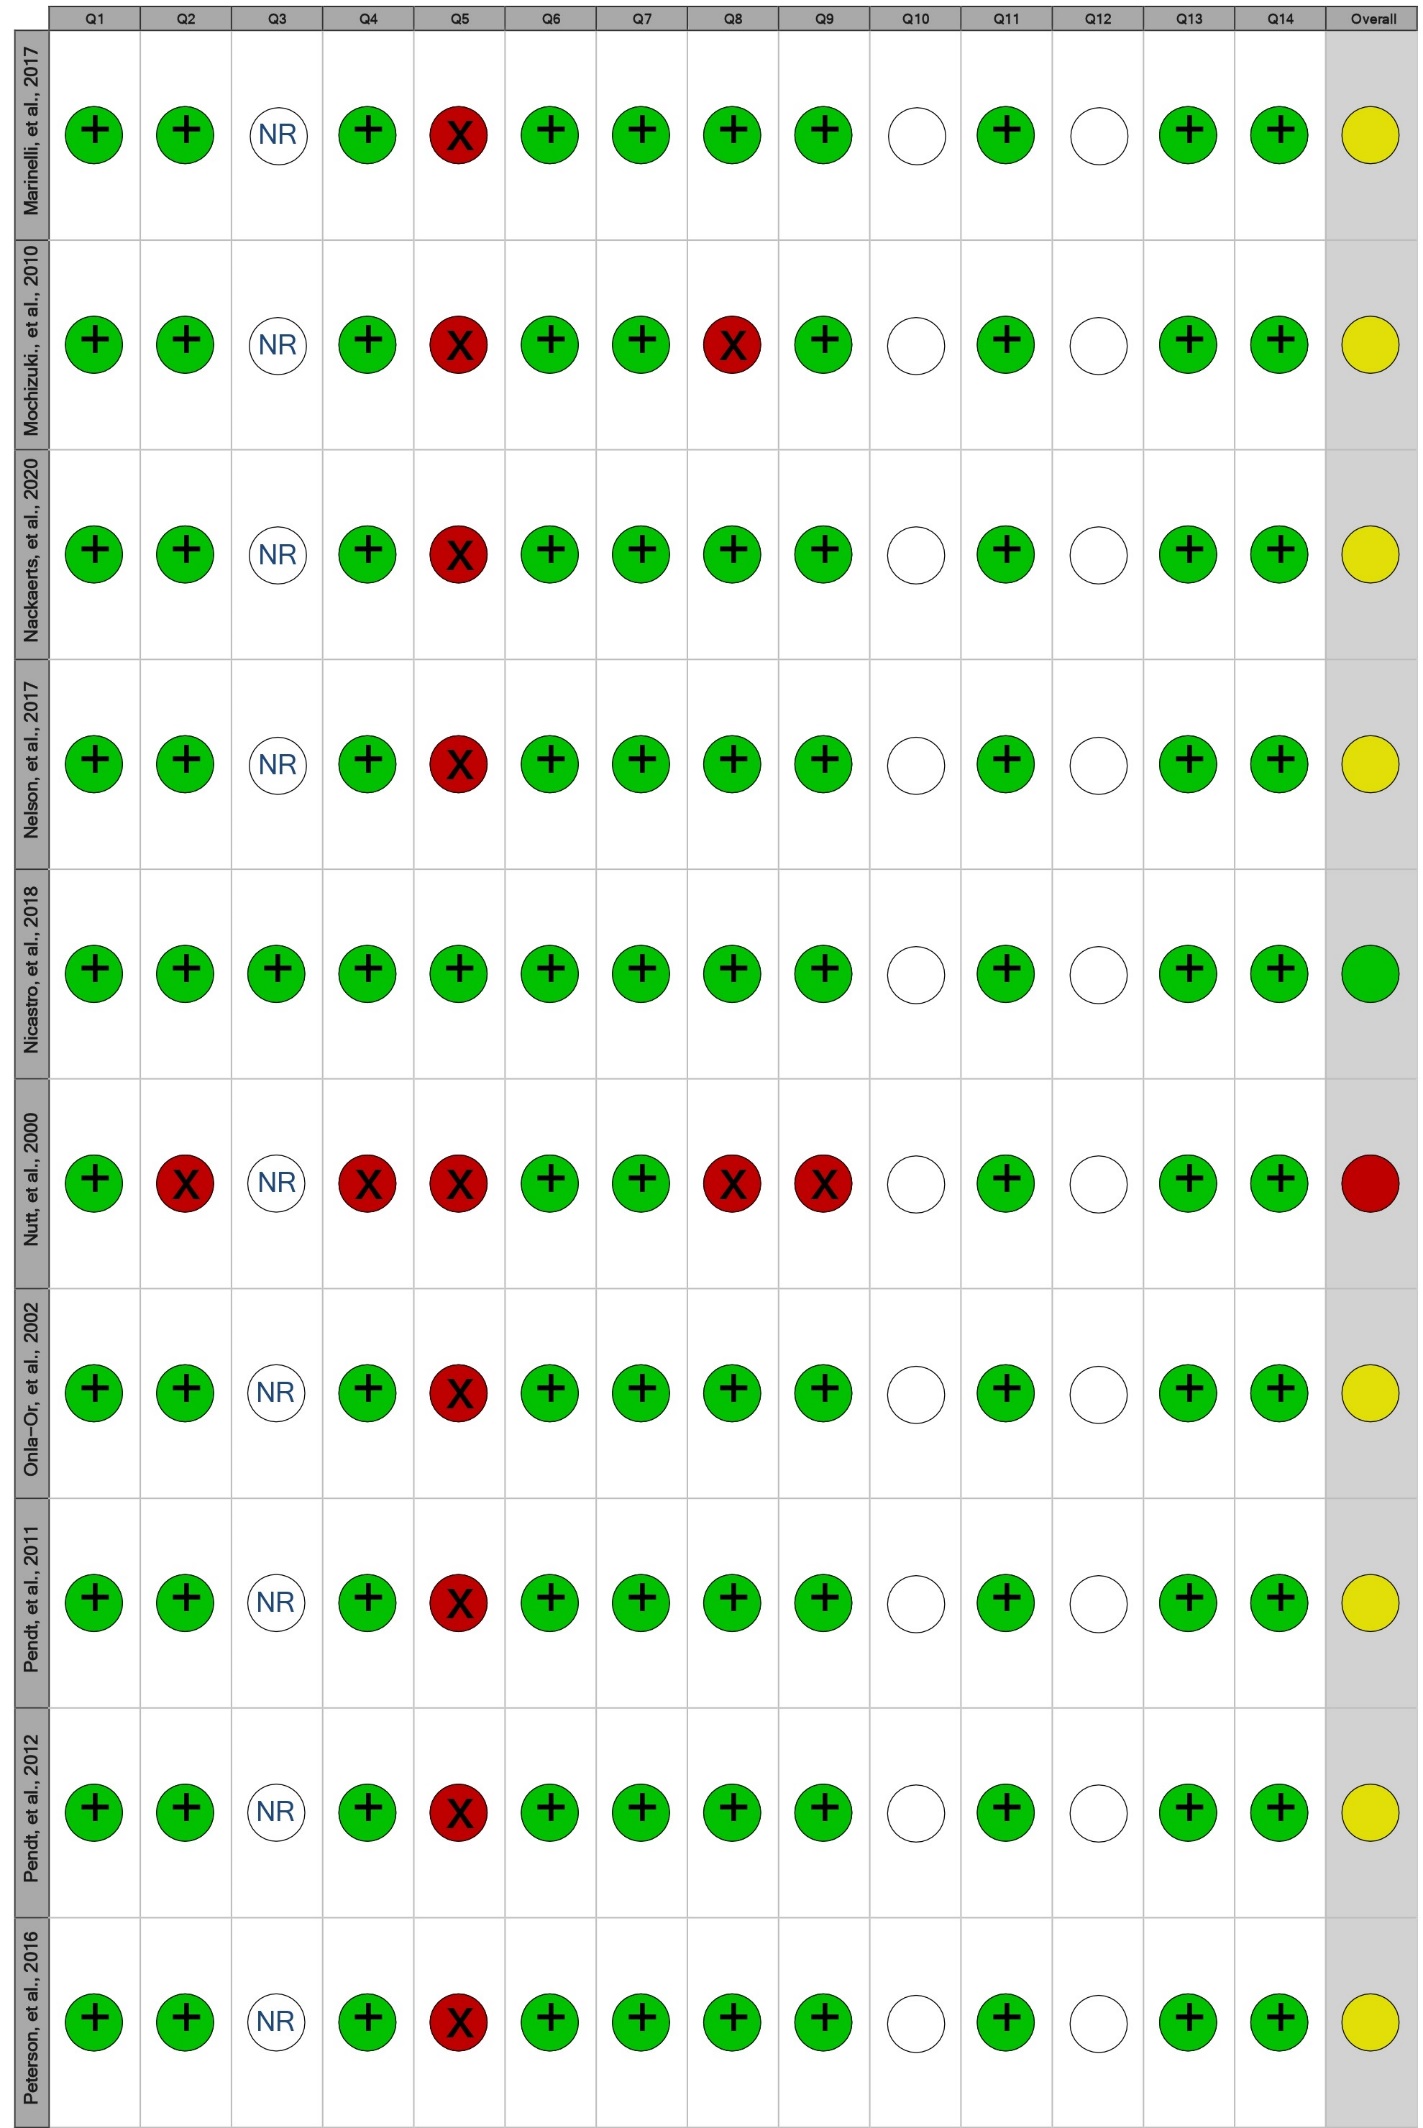


**Footnotes: • = No/Poor; • = Fair; • = Yes/Good; NR= not reported; " " = not applicable.**

**Supplementary 8.** *Continue*


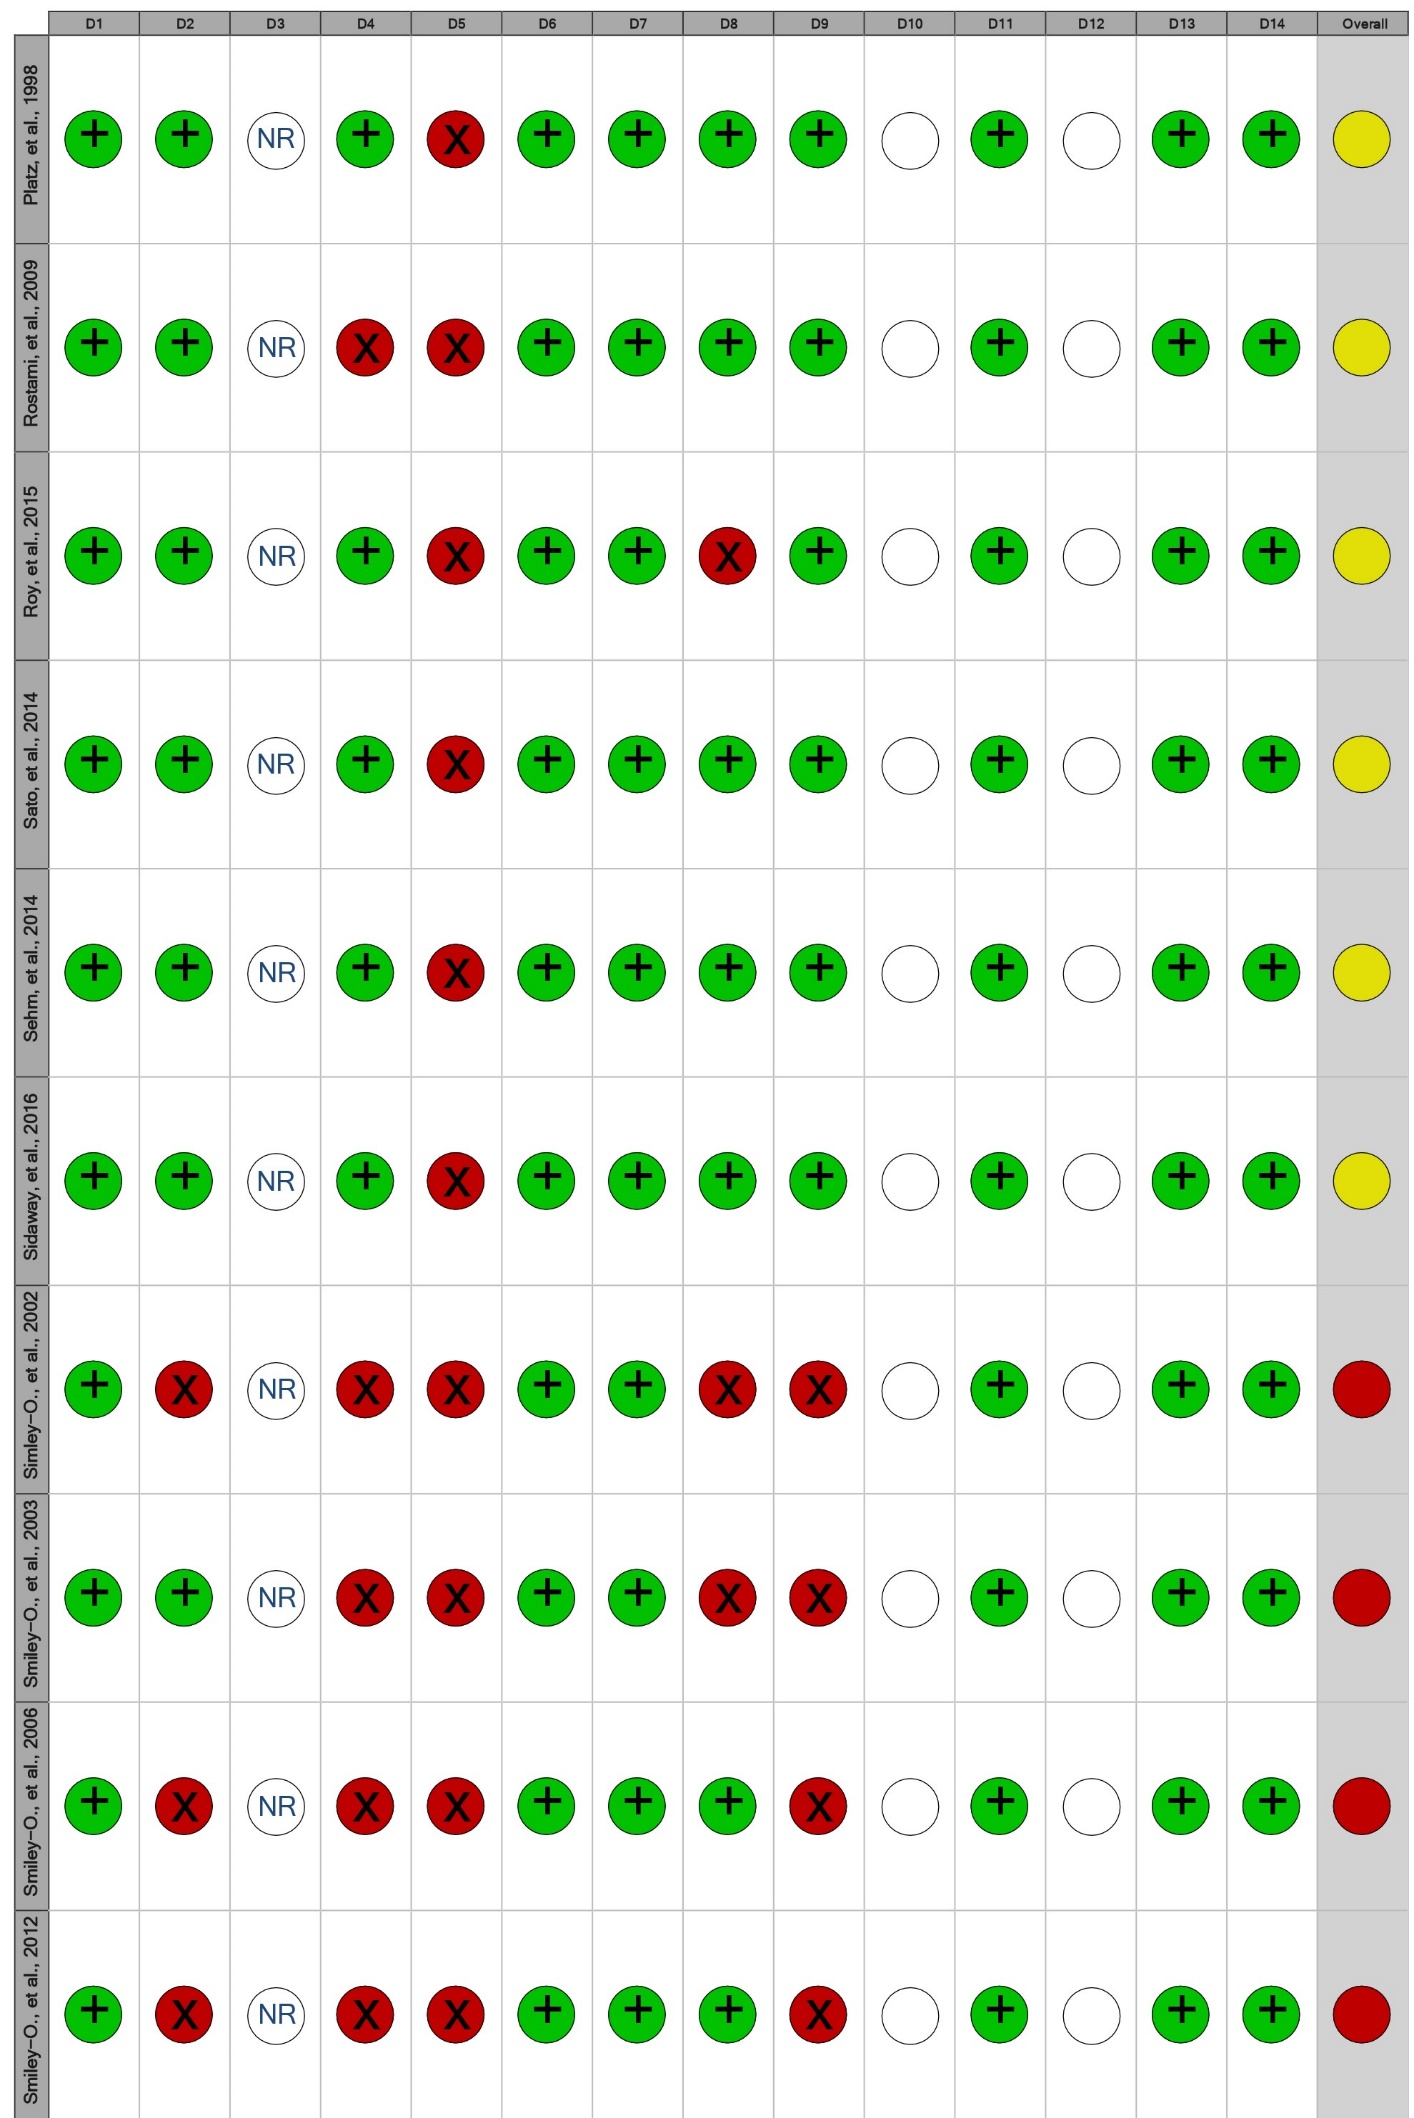


**Footnotes: • = No/Poor; • = Fair; • = Yes/Good; NR= not reported; " " = not applicable.**

**Supplementary 8.** *Continue*


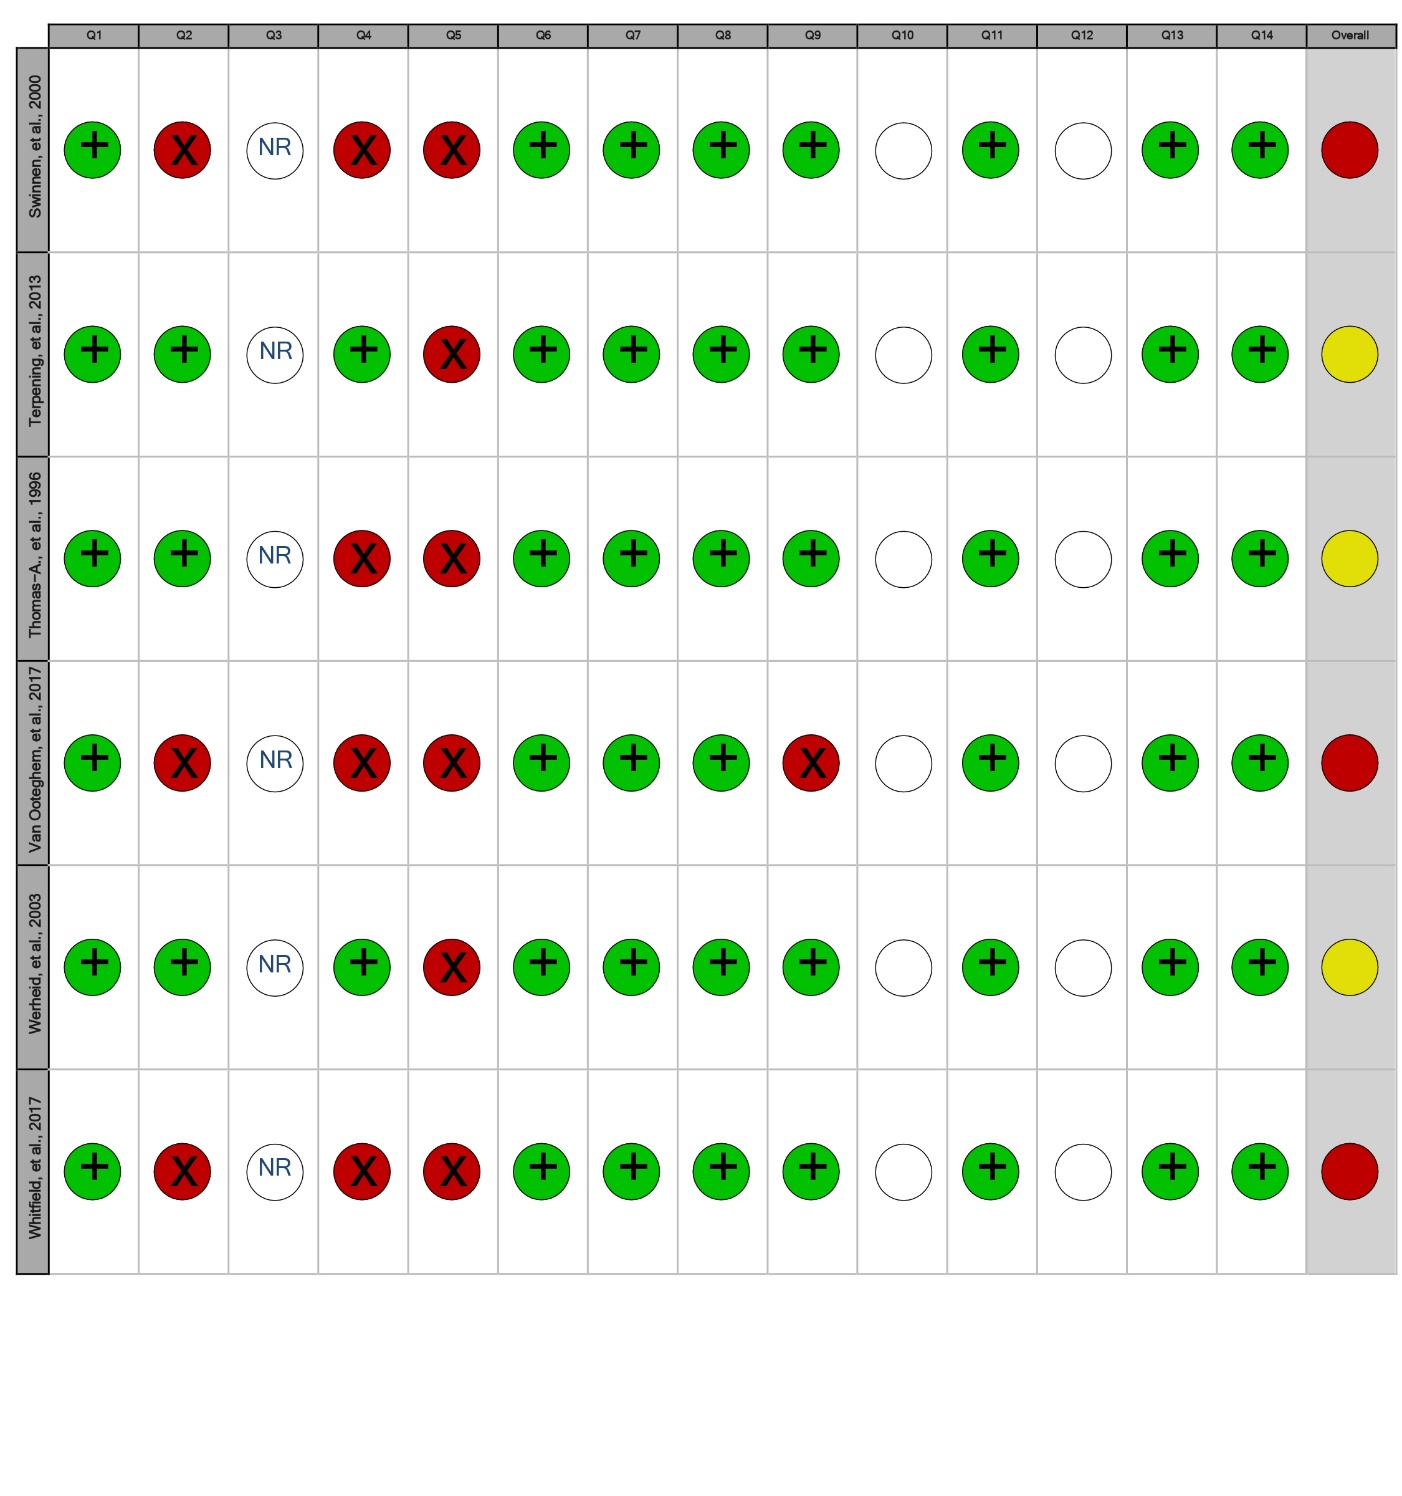


**Footnotes: • = No/Poor; • = Fair; • = Yes/Good; NR= not reported; " " = not applicable.**

**Supplementary 9.** **Funnels plots for motor skill retention after single and extended practice.**

Funnel plot – Motor skill retention after single practice.


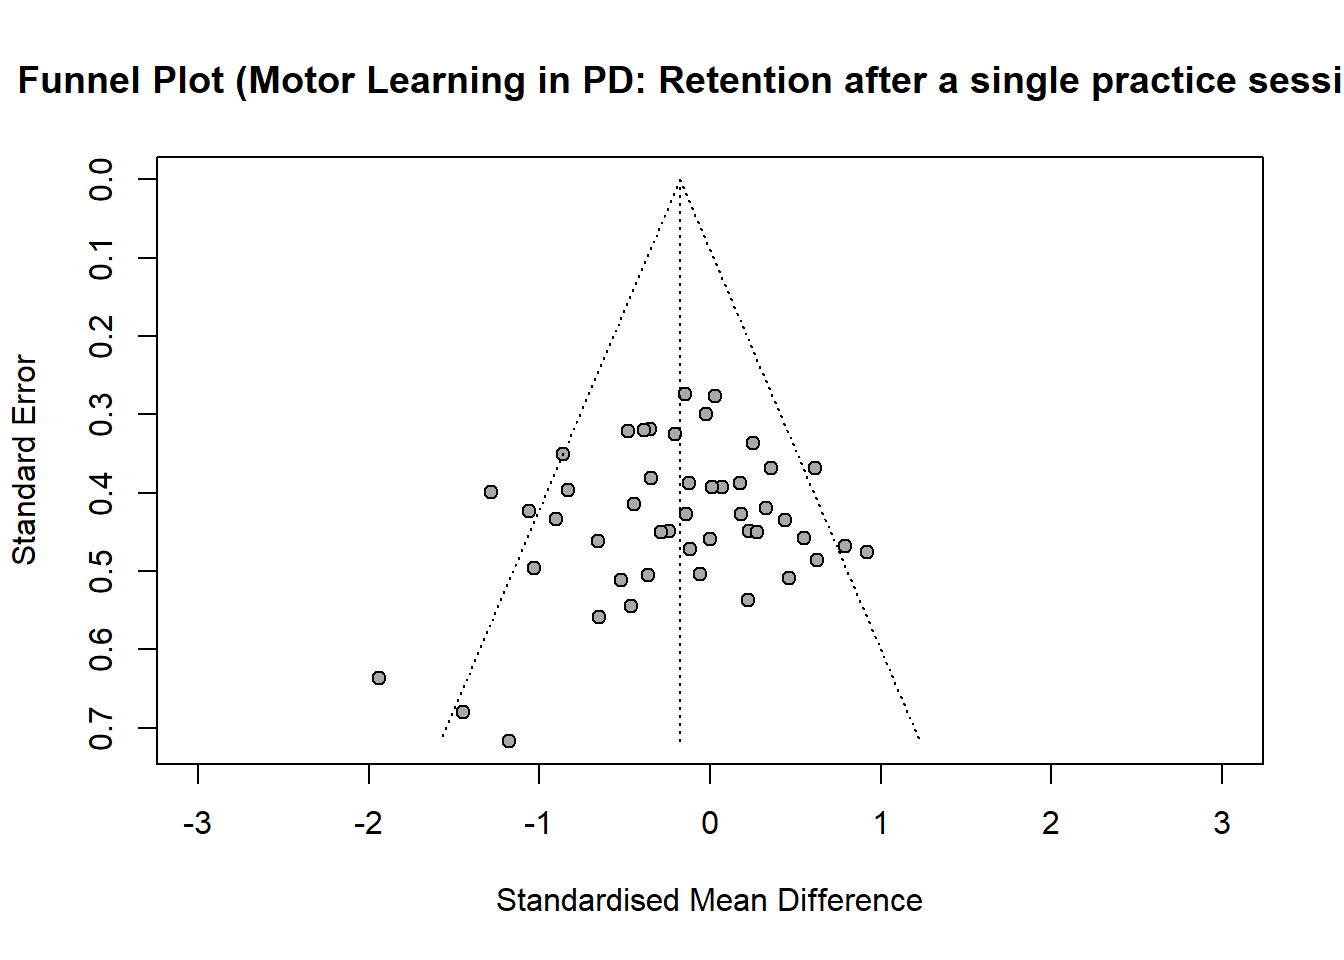


SMD

Funnel plots – Motor skill retention after extended practice.

**
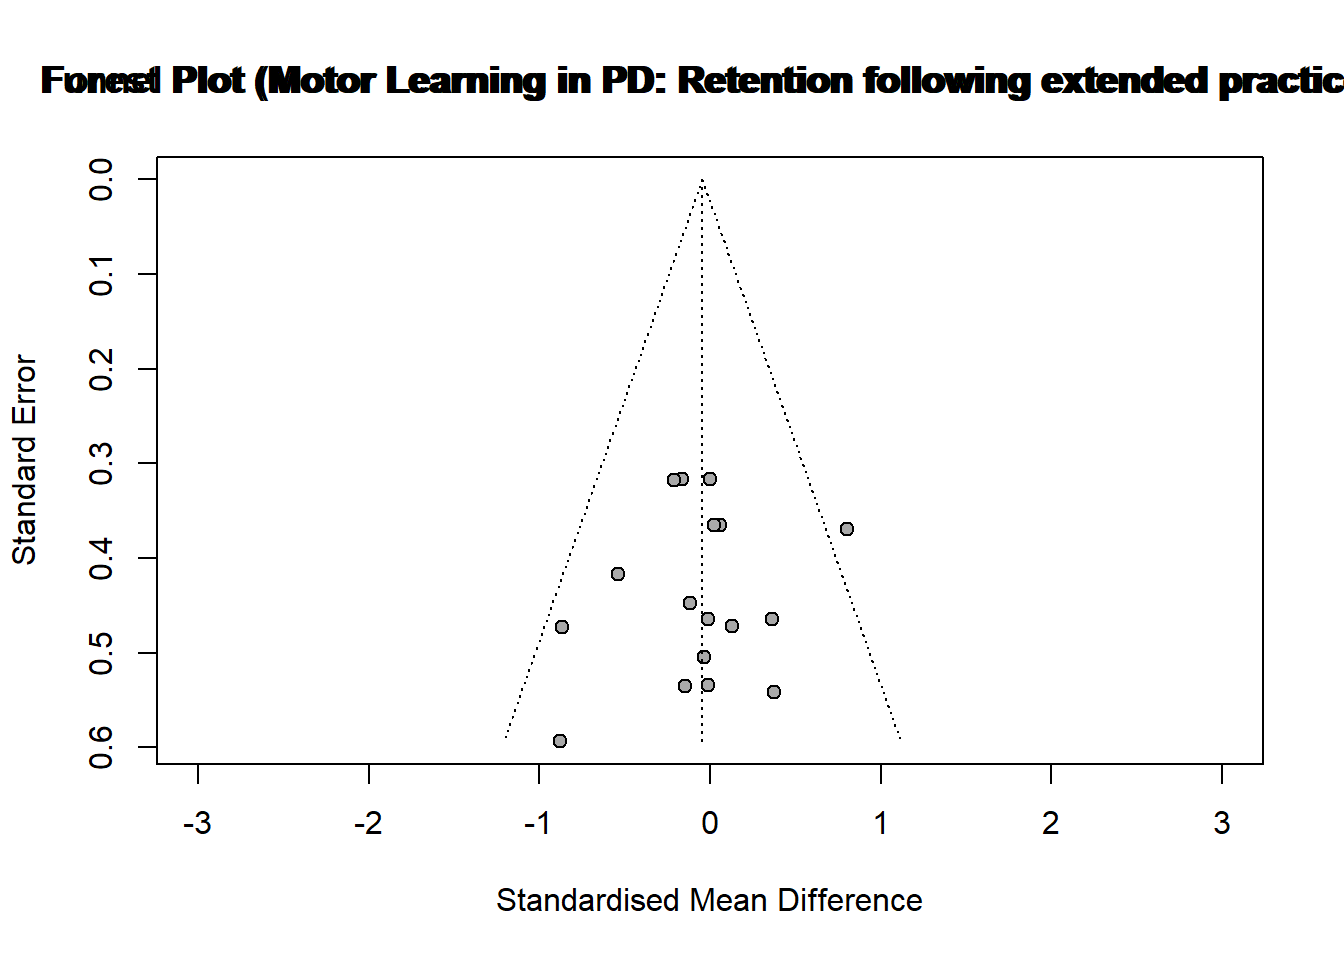
**

SMD

**Supplementary 10.** **Results of Egger’s tests.**

| **Egger’s test** | **Intercept** | **CI** | ***t-value*** | ***p*-*value*** |
| --- | --- | --- | --- | --- |
| *Motor skill retention after single practice* | -0.951 | -2.731; 0.829 | -1.046 | 0.301 |
| *Motor skill retention after extended practice* | -0.697 | -2.968; 1.574 | -0.602 | 0.556 |

**References**

Abbruzzese, G., Trompetto, C., Marinelli, L., 2009. The rationale for motor learning in Parkinson's disease. Eur J Phys Rehabil Med 45, 209-214.

Abdel-Malek, A., Markham, C.H., Marmarelis, P.Z., Marmarelis, V.Z., 1988. Quantifying deficiencies associated with Parkinson's disease by use of time-series analysis. Electroencephalogr Clin Neurophysiol 69, 24-33.

Adam, J.J., van Houdt, H., Scholtissen, B., Visser-Vandewalle, V., Winogrodzka, A., Duits, A., 2011. Executive control in Parkinson's disease: Effects of dopaminergic medication and deep brain stimulation on anti-cue keypress performance. Neuroscience Letters 500, 113-117.

Adams, S.G., Page, A.D., Jog, M., 2002. Summary feedback schedules and speech motor learning in Parkinson's disease. Journal of Medical Speech-Language Pathology 10, 215-220.

Agostino, R., Bagnato, S., Dinapoli, L., Modugno, N., Berardelli, A., 2005. Neither simple nor sequential arm movements are bradykinetic in parkinsonian patients with peak-dose dyskinesias. Clinical Neurophysiology 116, 2077-2082.

Agostino, R., Berardelli, A., Formica, A., Accornero, N., Manfredi, M., 1992. Sequential arm movements in patients with parkinson's disease, huntington's disease and dystonia. Brain 115, 1481-1495.

Agostino, R., Sanes, J.N., Hallett, M., 1996. Motor skill learning in Parkinson's disease. J Neurol Sci 139, 218-226.

Alberts, J.L., Saling, M., Adler, C.H., Stelmach, G.E., 2000. Disruptions in the reach-to-grasp actions of Parkinson's patients. Experimental Brain Research 134, 353-362.

Alberts, J.L., Tresilian, J.R., Stelmach, G.E., 1998. The co-ordination and phasing of a bilateral prehension task. The influence of Parkinson's disease. Brain 121, 725-742.

Arroyo-Anll, E.M., Ingrand, P., Neau, J.-P., Gil, R., 2015. Procedural learning of semantic categorization in Parkinson's disease. Journal of Alzheimer's Disease 45, 205-216.

Arroyo-Anllo, E.M., Ingrand, P., Neau, J.P., Aireault, A., Gil, R., 2004. Pictorial and lexical priming: Patterns of implicit memory in Alzheimer's and Parkinson's disease patients. Eur. J. Cogn. Psychol. 16, 535-553.

Ashoori, A., McKeown, M.J., Oishi, M.M.K., 2011. Switched manual pursuit tracking to measure motor performance in Parkinson's disease. Iet Control Theory and Applications 5, 1970-1977.

Barzgari, A., Sojkova, J., Dowling, N.M., Pozorski, V., Okonkwo, O.C., Starks, E.J., Oh, J., Thiesen, F., Wey, A., Nicholas, C.R., Johnson, S., Gallagher, C.L., 2019. Arterial spin labeling reveals relationships between resting cerebral perfusion and motor learning in Parkinson's disease. Brain Imaging and Behavior 13, 577-587.

Beatty, W.W., Monson, N., 1990. Picture and Motor Sequencing in Parkinson's Disease. Journal of Geriatric Psychiatry and Neurology 3, 192-197.

Bédard, P., Sanes, J.N., 2009. On a basal ganglia role in learning and rehearsing visual-motor associations. Neuroimage 47, 1701-1710.

Bédard, P., Sanes, J.N., 2011. Basal ganglia-dependent processes in recalling learned visual-motor adaptations. Exp Brain Res 209, 385-393.

Behrman, A.L., Cauraugh, J.H., Light, K.E., 2000. Practice as an intervention to improve speeded motor performance and motor learning in Parkinson's disease. Journal of the Neurological Sciences 174, 127-136.

Beigi, M., Wilkinson, L., Gobet, F., Parton, A., Jahanshahi, M., 2016. Levodopa medication improves incidental sequence learning in Parkinson's disease. Neuropsychologia 93, 53-60.

Bellebaum, C., Kobza, S., Ferrea, S., Schnitzler, A., Pollok, B., Südmeyer, M., 2016. Strategies in probabilistic feedback learning in Parkinson patients OFF medication. Neuroscience 320, 8-18.

Bello, O., Sanchez, J.A., Fernandez-del-Olmo, M., 2008. Treadmill walking in Parkinson's disease patients: adaptation and generalization effect. Movement Disorders 23, 1243-1249.

Bondi, M.W., Kaszniak, A.W., 1991. Implicit and explicit memory in Alzheimer's disease and Parkinson's disease. J Clin Exp Neuropsychol 13, 339-358.

Boonsinsukh, R., Saengsirisuwan, V., Carlson-Kuhta, P., Horak, F.B., 2012. A Cane Improves Postural Recovery From an Unpracticed Slip During Walking in People With Parkinson Disease. Physical Therapy 92, 1117-1129.

Bowen, F.P., Brady, E., Yahr, M.D., 1973. Sensorimotor coordination in parkinson’s disease before and after levodopa therapy. Neurology 23, 1101-1106.

Broeder, S., Heremans, E., Pinto Pereira, M., Nackaerts, E., Meesen, R., Verheyden, G., Nieuwboer, A., 2019a. Does transcranial direct current stimulation during writing alleviate upper limb freezing in people with Parkinson's disease? A pilot study. Human Movement Science 65, 142-153.

Broeder, S., Nackaerts, E., Cuypers, K., Meesen, R., Verheyden, G., Nieuwboer, A., 2019b. tDCS-Enhanced Consolidation of Writing Skills and Its Associations With Cortical Excitability in Parkinson Disease: A Pilot Study. Neurorehabilitation and Neural Repair 33, 1050-1060.

Caligiuri, M.P., Heindel, W.C., Lohr, J.B., 1992. Sensorimotor disinhibition in Parkinson's disease: Effects of levodopa. Annals of Neurology 31, 53-58.

Camacho, P.B., Carbonari, R., Shen, S., Zadikoff, C., Kramer, A.F., López-Ortiz, C., 2019. Voluntary saccade training protocol in persons with Parkinson's disease and healthy adults. Frontiers in Aging Neuroscience 11.

Carbon, M., Eidelberg, D., 2006. Functional imaging of sequence learning in Parkinson's disease. Journal of the Neurological Sciences 248, 72-77.

Carbon, M., Felice Ghilardi, M., Dhawan, V., Eidelberg, D., 2007. Correlates of movement initiation and velocity in Parkinson's disease: A longitudinal PET study. Neuroimage 34, 361-370.

Carbon, M., Ghilardi, M.F., Feigin, A., Fukuda, M., Silvestri, G., Mentis, M.J., Ghez, C., Moeller, J.R., Eidelberg, D., 2003. Learning networks in health and Parkinson's disease: Reproducibility and treatment effects. Human Brain Mapping 19, 197-211.

Carbon, M., Ma, Y., Barnes, A., Dhawan, V., Chaly, T., Ghilardi, M.F., Eidelberg, D., 2004. Caudate nucleus: influence of dopaminergic input on sequence learning and brain activation in Parkinsonism. Neuroimage 21, 1497-1507.

Carbon, M., Reetz, K., Ghilardi, M.F., Dhawan, V., Eidelberg, D., 2010. Early Parkinson's disease: Longitudinal changes in brain activity during sequence learning. Neurobiology of Disease 37, 455-460.

Carey, J.R., Bhatt, E., Nagpal, A., 2005. Neuroplasticity Promoted by Task Complexity. Exercise and Sport Sciences Reviews 33.

Carey, J.R., Deskin, K.A., Josephson, K.T., Wichmann, R.L., 2002. Sex differences in tracking performance in patients with Parkinson's disease. Archives of Physical Medicine and Rehabilitation 83, 972-977.

Catala, M.M., Woitalla, D., Arampatzis, A., 2016. Reactive but not predictive locomotor adaptability is impaired in young Parkinson's disease patients. Gait & Posture 48, 177-182.

Chen, C.-L., Lou, S.-Z., Wu, H.-W., Wu, S.-K., Yeung, K.-T., Su, F.-C., 2014. Effects of the type and direction of support surface perturbation on postural responses. Journal of NeuroEngineering and Rehabilitation 11, 50.

Chen, J., Ho, S.L., Lee, T.M., Chang, R.S., Pang, S.Y., Li, L., 2016. Visuomotor control in patients with Parkinson's disease. Neuropsychologia 80, 102-114.

Chiviacowsky, S., Wulf, G., Lewthwaite, R., Campos, T., 2012. Motor learning benefits of self-controlled practice in persons with Parkinson's disease. Gait & Posture 35, 601-605.

Chong, R.K., Horak, F.B., Woollacott, M.H., 2000. Parkinson's disease impairs the ability to change set quickly. J Neurol Sci 175, 57-70.

Chuma, T., Faruque Reza, M., Ikoma, K., Mano, Y., 2006. Motor learning of hands with auditory cue in patients with Parkinson's disease. J Neural Transm (Vienna) 113, 175-185.

Chung, Y.C., Lewthwaite, R., Winstein, C.J., Monterosso, J.R., Fisher, B.E., 2020. Expectancy and affective response to challenging balance practice conditions in individuals with Parkinson's disease. European Journal of Neuroscience.

Contreras-Vidal, J.L., Buch, E.R., 2003. Effects of Parkinson's disease on visuomotor adaptation. Experimental Brain Research 150, 25-32.

Cressman, E.K., Salomonczyk, D., Constantin, A., Miyasaki, J., Moro, E., Chen, R., Strafella, A., Fox, S., Lang, A.E., Poizner, H., Henriques, D.Y.P., 2021. Proprioceptive recalibration following implicit visuomotor adaptation is preserved in Parkinson's disease. Exp Brain Res 239, 1551-1565.

Cunnington, R., Iansek, R., Bradshaw, J.L., 1999. Movement-related potentials in Parkinson's disease: External cues and attentional strategies. Movement Disorders 14, 63-68.

Dan, X., King, B.R., Doyon, J., Chan, P., 2015. Motor Sequence Learning and Consolidation in Unilateral De Novo Patients with Parkinson’s Disease. PLoS One 10, e0134291.

Dantas, I., Leal, J., Hilgert, L., Allegretti, A., Mendes, F., 2018. Training healthy persons and individuals with Parkinson's disease to use Xbox Kinect games: A preliminary study. International Journal of Therapy and Rehabilitation 25, 280-290.

Daum, I., Schugens, M.M., Breitenstein, C., Topka, H., Spieker, S., 1996. Classical eyeblink conditioning in Parkinson's disease. Movement Disorders 11, 639-646.

De Boer, C., Van Der Steen, J., Mattace-Raso, F., Boon, A.J.W., Pel, J.J.M., 2016. The effect of neurodegeneration on visuomotor behavior in Alzheimer's disease and Parkinson's disease. Motor Control 20, 1-20.

Deroost, N., Kerckhofs, E., Coene, M., Wijnants, G., Soetens, E., 2006. Learning sequence movements in a homogenous sample of patients with Parkinson's disease. Neuropsychologia 44, 1653-1662.

DiFrancisco-Donoghue, J., Jung, M.K., Geisel, P., Werner, W.G., 2015. Learning effects of the sensory organization test as a measure of postural control and balance in Parkinson's disease. Parkinsonism & Related Disorders 21, 858-861.

Djamshidian, A., Jha, A., O'Sullivan, S.S., Silveira-Moriyama, L., Jacobson, C., Brown, P., Lees, A., Averbeck, B.B., 2010. Risk and Learning in Impulsive and Nonimpulsive Patients With Parkinson's Disease. Movement Disorders 25, 2203-2210.

Dominey, P., Decety, J., Broussolle, E., Chazot, G., Jeannerod, M., 1995. MOTOR IMAGERY OF A LATERALIZED SEQUENTIAL TASK IS ASYMMETRICALLY SLOWED IN HEMI-PARKINSONS PATIENTS. Neuropsychologia 33, 727-741.

Dominey, P.F., VentreDominey, J., Broussolle, E., Jeannerod, M., 1997. Analogical transfer is effective in a serial reaction time task in Parkinson's disease: Evidence for a dissociable form of sequence learning. Neuropsychologia 35, 1-9.

dos Santos Mendes, F.A., Pompeu, J.E., Modenesi Lobo, A., Guedes da Silva, K., Oliveira Tde, P., Peterson Zomignani, A., Pimentel Piemonte, M.E., 2012. Motor learning, retention and transfer after virtual-reality-based training in Parkinson's disease--effect of motor and cognitive demands of games: a longitudinal, controlled clinical study. Physiotherapy 98, 217-223.

Doyon, J., Gaudreau, D., Laforce Jr, R.L., Castonguay, M., Bédard, P.J., Bédard, F., Bouchard, J.P., 1997. Role of the striatum, cerebellum, and frontal lobes in the learning of a visuomotor sequence. Brain and Cognition 34, 218-245.

Dudai, Y., 2004. The neurobiology of consolidations, or, how stable is the engram? Annu Rev Psychol 55, 51-86.

Elangovan, N., Tuite, P.J., Konczak, J., 2018. Somatosensory Training Improves Proprioception and Untrained Motor Function in Parkinson's Disease. Frontiers in Neurology 9.

Esculier, J.F., Vaudrin, J., Bériault, P., Gagnon, K., Tremblay, L.E., 2012. Home-based balance training programme using Wii Fit with balance board for Parkinsons's disease: a pilot study. J Rehabil Med 44, 144-150.

Fattapposta, F., Pierelli, F., Traversa, G., My, F., Mostarda, M., D'Alessio, C., Soldati, G., Osborn, J., Amabile, G., 2000. Preprogramming and control activity of bimanual self-paced motor task in Parkinson's disease. Clinical Neurophysiology 111, 873-883.

Fernandez-Ruiz, J., Diaz, R., Hall-Haro, C., Vergara, P., Mischner, J., Nunez, L., Drucker-Colin, R., Ochoa, A., Alonso, M.E., 2003. Normal prism adaptation but reduced after-effect in basal ganglia disorders using a throwing task. European Journal of Neuroscience 18, 689-694.

Filoteo, J.V., Salmon, D.P., Maddox, W.T., Song, D.D., 2005. Information-integration category learning in patients with striatal dysfunction. Neuropsychology 19, 212-222.

Flowers, K.A., 1976. Visual "closed-loop" and "open-loop" characteristics of voluntary movement in patients with Parkinsonism and intention tremor. Brain 99, 269-310.

Frith, C.D., Bloxham, C.A., Carpenter, K.N., 1986. Impairments in the learning and performance of a new manual skill in patients with Parkinson's disease. J Neurol Neurosurg Psychiatry 49, 661-668.

Gamble, K.R., Cummings, T.J., Jr., Lo, S.E., Ghosh, P.T., Howard, J.H., Jr., Howard, D.V., 2014. Implicit sequence learning in people with Parkinson's disease. Frontiers in Human Neuroscience 8.

Geffe, S., Schindlbeck, K.A., Mehl, A., Jende, J., Klostermann, F., Marzinzik, F., 2016. The single intake of levodopa modulates implicit learning in drug na < ve, de novo patients with idiopathic Parkinson's disease. Journal of Neural Transmission 123, 601-610.

Ghilardi, M.F., Eidelberg, D., Silvestri, G., Ghez, C., 2003. The differential effect of PD and normal aging on early explicit sequence learning. Neurology 60, 1313-1319.

Ghilardi, M.F., Feigin, A.S., Battaglia, F., Silvestri, G., Mattis, P., Eidelberg, D., Di Rocco, A., 2007. L-Dopa infusion does not improve explicit sequence learning in Parkinson's disease. Parkinsonism Relat Disord 13, 146-151.

Gobel, E.W., Blomeke, K., Zadikoff, C., Simuni, T., Weintraub, S., Reber, P.J., 2013. Implicit Perceptual-Motor Skill Learning in Mild Cognitive Impairment and Parkinson's Disease. Neuropsychology 27, 314-321.

Goldenberg, G., Wimmer, A., Auff, E., Schnaberth, G., 1986. Impairment of motor planning in patients with Parkinson's disease: evidence from ideomotor apraxia testing. J Neurol Neurosurg Psychiatry 49, 1266-1272.

Grogan, J.P., Tsivos, D., Smith, L., Knight, B.E., Bogacz, R., Whone, A., Coulthard, E.J., 2017. Effects of dopamine on reinforcement learning and consolidation in Parkinson's disease. Elife 6.

Guadagnoli, M.A., Leis, B., Van Gemmert, A.W.A., Stelmach, G.E., 2002. The relationship between knowledge of results and motor learning in Parkinsonian patients. Parkinsonism & Related Disorders 9, 89-95.

Hadj-Bouziane, F., Benatru, I., Brovelli, A., Klinger, H., Thobois, S., Broussolle, E., Boussaoud, D., Meunier, M., 2013. Advanced Parkinson's disease effect on goal-directed and habitual processes involved in visuomotor associative learning. Frontiers in Human Neuroscience 6.

Harrington, D.L., Haaland, K.Y., Yeo, R.A., Marder, E., 1990. Procedural memory in Parkinson's disease: impaired motor but not visuoperceptual learning. J Clin Exp Neuropsychol 12, 323-339.

Hayes, H.A., Hunsaker, N., 2015. Does Dopamine Replacement Medication Affect Postural Sequence Learning in Parkinson’s Disease? Motor Control 19, 325-340.

Heindel, W., Salmon, D., Shults, C., Walicke, P., Butters, N., 1989. Neuropsychological evidence for multiple implicit memory systems: A comparison of Alzheimer's, Huntington's, and Parkinson's disease patients. The Journal of neuroscience : the official journal of the Society for Neuroscience 9, 582-587.

Hodgson, T.L., Sumner, P., Molyva, D., Sheridan, R., Kennard, C., 2013. Learning and switching between stimulus-saccade associations in Parkinson's disease. Neuropsychologia 51, 1350-1360.

Horiba, M., Ueki, Y., Nojima, I., Shimizu, Y., Sahashi, K., Itamoto, S., Suzuki, A., Yamada, G., Matsukawa, N., Wada, I., 2019. Impaired Motor Skill Acquisition Using Mirror Visual Feedback Improved by Transcranial Direct Current Stimulation (tDCS) in Patients With Parkinson's Disease. Frontiers in Neuroscience 13.

Huang, P., Tan, Y.Y., Liu, D.Q., Herzallah, M.M., Lapidow, E., Wang, Y., Zang, Y.F., Gluck, M.A., Chen, S.D., 2017. Motor-symptom laterality affects acquisition in Parkinson's disease: A cognitive and functional magnetic resonance imaging study. Movement Disorders 32, 1047-1055.

Ioffe, M.E., Ustinova, K.I., Chernikova, L.A., Kulikov, M.A., 2006. Supervised learning of postural tasks in patients with poststroke hemiparesis, Parkinson's disease or cerebellar ataxia. Experimental Brain Research 168, 384-394.

Isaias, I.U., Moisello, C., Marotta, G., Schiavella, M., Canesi, M., Perfetti, B., Cavallari, P., Pezzoli, G., Ghilardi, M.F., 2011. Dopaminergic Striatal Innervation Predicts Interlimb Transfer of a Visuomotor Skill. Journal of Neuroscience 31, 14458-14462.

Jackson, G.M., Jackson, S.R., Harrison, J., Henderson, L., Kennard, C., 1995a. Serial reaction time learning and Parkinson's disease: evidence for a procedural learning deficit. Neuropsychologia 33, 577-593.

Jackson, S.R., Jackson, G.M., Harrison, J., Henderson, L., Kennard, C., 1995b. The internal control of action and Parkinson's disease: a kinematic analysis of visually-guided and memory-guided prehension movements. Experimental Brain Research 105, 147-162.

Jordan, N., Sagar, H.J., 1994. The role of the striatum in motor learning: Dissociations between isometric motor control processes in Parkinson's disease. International Journal of Neuroscience 77, 153-165.

Kawashima, S., Ueki, Y., Kato, T., Ito, K., Matsukawa, N., 2018. Reduced striatal dopamine release during motor skill acquisition in Parkinson's disease. PLoS One 13.

Kelly, S.W., Jahanshahi, M., Dirnberger, G., 2004. Learning of ambiguous versus hybrid sequences by patients with Parkinson's disease. Neuropsychologia 42, 1350-1357.

Kemeny, F., Demeter, G., Racsmany, M., Valalik, I., Lukacs, A., 2019. Impaired sequential and partially compensated probabilistic skill learning in Parkinson's disease. Journal of Neuropsychology 13, 509-528.

Kitahara, E., Shimo, Y., Mori, H., Nagaoka, M., 2018. Preservation of explicit learning of visuomotor sequences during Parkinson's disease progression. Scientific Reports 8.

Krebs, H.I., Hogan, N., Hening, W., Adamovich, S.V., Poizner, H., 2001. Procedural motor learning in Parkinson's disease. Experimental Brain Research 141, 425-437.

Kwak, Y., Muller, M., Bohnen, N.I., Dayalu, P., Seidler, R.D., 2010. Effect of Dopaminergic Medications on the Time Course of Explicit Motor Sequence Learning in Parkinson's Disease. Journal of Neurophysiology 103, 942-949.

Kwak, Y., Muller, M., Bohnen, N.I., Dayalu, P., Seidler, R.D., 2012. L-DOPA changes ventral striatum recruitment during motor sequence learning in Parkinson's disease. Behavioural Brain Research 230, 116-124.

Lahlou, S., Gabitov, E., Owen, L., Shohamy, D., Sharp, M., 2022. Preserved motor memory in Parkinson's disease. Neuropsychologia 167, 108161.

Lee, Y.-Y., Winstein, C.J., Gordon, J., Petzinger, G.M., Zelinski, E.M., Fisher, B.E., 2016. Context-dependent learning in people with Parkinson's disease. Journal of Motor Behavior 48, 240-248.

Lee, Y.Y., Tai, C.H., Fisher, B.E., 2019. Context-Dependent Behavior in Parkinson’s Disease With Freezing of Gait. Neurorehabilitation and Neural Repair 33, 1040-1049.

Lester, M.E., Cavanaugh, J.T., Foreman, K.B., Shaffer, S.W., Marcus, R., Dibble, L.E., 2017. Adaptation of postural recovery responses to a vestibular sensory illusion in individuals with Parkinson disease and healthy controls. Clinical Biomechanics 48, 73-79.

Lin, C., Sullivan, K.J., Wu, A.D., Kantak, S., Winstein, C.J., 2007. Effect of task practice order on motor skill learning in adults with Parkinson disease: a pilot study. Physical Therapy 87, 1120-1131.

Linden, A., Bracke-Tolkmitt, R., Lutzenberger, W., Canavan, A.G., et al., 1990. Slow cortical potentials in Parkinsonian patients during the course of an associative learning task. J. PSYCHOPHYSIOL. 4, 145-162.

Lu, C., Amundsen-Huffmaster, S.L., Louie, K.H., Lowe, R., Abulu, R., McGovern, R.A., Vitek, J.L., MacKinnon, C.D., Cooper, S.E., 2021. Comparison of forward and backward postural perturbations in mild-to-moderate Parkinson's disease. Gait & Posture 84, 205-208.

Lukos, J.R., Lee, D., Poizner, H., Santello, M., 2010. Anticipatory Modulation of Digit Placement for Grasp Control Is Affected by Parkinson's Disease. Plos One 5.

MacAskill, M.R., Anderson, T.J., Jones, R.D., 2002. Adaptive modification of saccade amplitude in Parkinson's disease. Brain 125, 1570-1582.

Manuel, A.L., Nicastro, N., Schnider, A., Guggisberg, A.G., 2018. Resting-state connectivity after visuo-motor skill learning is inversely associated with offline consolidation in Parkinson's disease and healthy controls. Cortex 106, 237-247.

Marcelino D.A., A.L., Horn, A., Krause, P., Kuhn, A.A., Neumann, W.-J., 2019. Subthalamic neuromodulation improves short-term motor learning in Parkinson's disease. Brain: A Journal of Neurology 142, 2198-2206.

Marinelli, L., Crupi, D., Di Rocco, A., Bove, M., Eidelberg, D., Abbruzzese, G., Ghilardi, M.F., 2009. Learning and consolidation of visuo-motor adaptation in Parkinson's disease. Parkinsonism & Related Disorders 15, 6-11.

Marinelli, L., Perfetti, B., Moisello, C., Di Rocco, A., Eidelberg, D., Abbruzzese, G., Ghilardi, M.F., 2010. Increased Reaction Time Predicts Visual Learning Deficits in Parkinson's Disease. Movement Disorders 25, 1498-1501.

Marinelli, L., Trompetto, C., Canneva, S., Mori, L., Nobili, F., Fattapposta, F., Currà, A., Abbruzzese, G., Ghilardi, M.F., 2017. Learning “How to Learn”: Super Declarative Motor Learning Is Impaired in Parkinson’s Disease. Neural Plasticity 2017, 3162087.

Meissner, S.N., Krause, V., Sudmeyer, M., Hartmann, C.J., Pollok, B., 2018. The significance of brain oscillations in motor sequence learning: Insights from Parkinson's disease. Neuroimage-Clinical 20, 448-457.

Meissner, S.N., Krause, V., Sudmeyer, M., Hartmann, C.J., Pollok, B., 2019. Pre-stimulus beta power modulation during motor sequence learning is reduced in 'Parkinson's disease. Neuroimage-Clinical 24.

Meissner, S.N., Sudmeyer, M., Keitel, A., Pollok, B., Bellebaum, C., 2016. Facilitating effects of deep brain stimulation on feedback learning in Parkinson's disease. Behavioural Brain Research 313, 88-96.

Mentis, M.J., Dhawan, V., Feigin, A., Delalot, D., Zgaljardic, D., Edwards, C., Eidelberg, D., 2003a. Early stage Parkinson's disease patients and normal volunteers: comparative mechanisms of sequence learning. Hum Brain Mapp 20, 246-258.

Mentis, M.J., Dhawan, V., Nakamura, T., Ghilardi, M., Feigin, A., Edwards, C., Ghez, C., Eidelberg, D., 2003b. Enhancement of brain activation during trial-and-error sequence learning in early PD. Neurology 60, 612-619.

Merritt, K.E., Seergobin, K.N., Mendonca, D.A., Jenkins, M.E., Goodale, M.A., MacDonald, P.A., 2017. Automatic Online Motor Control Is Intact in Parkinson's Disease With and Without Perceptual Awareness. Eneuro 4.

Messier, J., Adamovich, S., Jack, D., Hening, W., Sage, J., Poizner, H., 2007. Visuomotor learning in immersive 3D virtual reality in Parkinson's disease and in aging. Experimental Brain Research 179, 457-474.

Mochizuki-Kawai, H., Mochizuki, S., Kawamura, M., 2010. A flexible sequential learning deficit in patients with Parkinson's disease: a 2 x 8 button-press task. Experimental Brain Research 202, 147-153.

Moisello, C., Blanco, D., Fontanesi, C., Lin, J., Biagioni, M., Kumar, P., Brys, M., Loggini, A., Marinelli, L., Abbruzzese, G., Quartarone, A., Tononi, G., Di Rocco, A., Ghilardi, M.F., 2015. TMS enhances retention of a motor skill in Parkinson's disease. Brain Stimul 8, 224-230.

Mollion, H., Dominey, P.F., Broussolle, E., Ventre-Dominey, J., 2011. Subthalamic Nucleus Stimulation Selectively Improves Motor and Visual Memory Performance in Parkinson's Disease. Movement Disorders 26, 2019-2025.

Mongeon, D., Blanchet, P., Messier, J., 2013. Impact of Parkinson's disease and dopaminergic medication on adaptation to explicit and implicit visuomotor perturbations. Brain Cogn 81, 271-282.

Moreno Catalá, M., Woitalla, D., Arampatzis, A., 2016. Reactive but not predictive locomotor adaptability is impaired in young Parkinson's disease patients. Gait Posture 48, 177-182.

Myers, C.E., Shohamy, D., Gluck, M.A., Grossman, S., Kluger, A., Ferris, S., Golomb, J., Schnirman, G., Schwartz, R., 2003. Dissociating hippocampal versus basal ganglia contributions to learning and transfer. Journal of Cognitive Neuroscience 15, 185-193.

Nackaerts, E., Ginis, P., Heremans, E., Swinnen, S.P., Vandenberghe, W., Nieuwboer, A., 2020. Retention of touchscreen skills is compromised in Parkinson's disease. Behav. Brain Res. 378.

Nakamura, T., Ghilardi, M.F., Mentis, M., Dhawan, V., Fukuda, M., Hacking, A., Moeller, J.R., Ghez, C., Eidelberg, D., 2000. Functional networks in motor sequence learning: Abnormal topographies in Parkinson's disease. Human Brain Mapping 12, 42-60.

Nakamura, T., Ghilardi, M.F., Mentis, M., Dhawan, V., Fukuda, M., Hacking, A., Moeller, J.R., Ghez, C., Eidelberg, D., 2001. Functional networks in motor sequence learning: abnormal topographies in Parkinson's disease. Hum Brain Mapp 12, 42-60.

Nemanich, S.T., Earhart, G., 2015. Prism adaptation in Parkinson disease: comparing reaching to walking and freezers to non-freezers. Experimental Brain Research 233, 2301-2310.

Nieuwboer, A., Rochester, L., Müncks, L., Swinnen, S.P., 2009. Motor learning in Parkinson's disease: limitations and potential for rehabilitation. Parkinsonism Relat Disord 15 Suppl 3, S53-58.

Normand, R., Kerr, R., Grimes, J.D., 1993. Complex Motor Performance and Parkinson's Disease. Can. J. Aging 12, 89-101.

Oates, A.R., Van Ooteghem, K., Frank, J.S., Patla, A.E., Horak, F.B., 2013. Adaptation of gait termination on a slippery surface in Parkinson's disease. Gait & Posture 37, 516-520.

Oishi, M.M., TalebiFard, P., McKeown, M.J., 2011. Assessing manual pursuit tracking in Parkinson's disease via linear dynamical systems. Ann Biomed Eng 39, 2263-2273.

Oishi, M.M.K., Ashoori, A., McKeown, M.J., Ieee, 2010. Mode Detection in Switched Pursuit Tracking Tasks: Hybrid Estimation to Measure Performance in Parkinson's Disease, 49th Ieee Conference on Decision and Control, pp. 2124-2130.

Olson, M., Lockhart, T.E., Lieberman, A., 2019. Motor Learning Deficits in Parkinson's Disease (PD) and Their Effect on Training Response in Gait and Balance: A Narrative Review. Front Neurol 10, 62.

Onla-Or, S., Winstein, C.J., 2008. Determining the Optimal Challenge Point for Motor Skill Learning in Adults With Moderately Severe Parkinson’s Disease. Neurorehabil Neural Repair 22, 385-395.

Osman, M., Wilkinson, L., Beigi, M., Castaneda, C.S., Jahanshahi, M., 2008. Patients with Parkinson's disease learn to control complex systems via procedural as well as non-procedural learning. Neuropsychologia 46, 2355-2363.

Paquet, F., Bedard, M.A., Levesque, M., Tremblay, P.L., Lemay, M., Blanchet, P.J., Scherzer, P., Chouinard, S., Filion, J., 2008. Sensorimotor adaptation in Parkinson's disease: evidence for a dopamine dependent remapping disturbance. Experimental Brain Research 185, 227-236.

Pascual-Leone, A., Grafman, J., Clark, K., Stewart, M., Massaquoi, S., Lou, J.S., Hallett, M., 1993. Procedural learning in Parkinson's disease and cerebellar degeneration. Ann Neurol 34, 594-602.

Peterson, D.S., Dijkstra, B.W., Horak, F.B., 2016. Postural motor learning in people with Parkinson's disease. Journal of Neurology 263, 1518-1529.

Platz, T., Brown, R.G., Marsden, C.D., 1998. Training improves the speed of aimed movements in Parkinson's disease. Brain 121, 505-514.

Price, A., Shin, J.C., 2009. The impact of Parkinson's disease on sequence learning: Perceptual pattern learning and executive function. Brain and Cognition 69, 252-261.

Rafal, R.D., Inhoff, A.W., Friedman, J.H., Bernstein, E., 1987. Programming and execution of sequential movements in Parkinson's disease. Journal of Neurology, Neurosurgery and Psychiatry 50, 1267-1273.

Robertson, C., Flowers, K.A., 1990. Motor set in Parkinson's disease. Journal of Neurology, Neurosurgery & Psychiatry 53, 583-592.

Roncacci, S., Troisi, E., Carlesimo, G.A., Nocentini, U., Caltagirone, C., 1996. Implicit memory in Parkinsonian patients: Evidence for deficient skill learning. European Neurology 36, 154-159.

Sarazin, M., Deweer, B., Merkl, A., Von Poser, N., Pillon, B., Dubois, B., 2002. Procedural learning and striatofrontal dysfunction in Parkinson's disease. Movement Disorders 17, 265-273.

Schendan, H.E., Tinaz, S., Maher, S.M., Stern, C.E., 2013. Frontostriatal and Mediotemporal Lobe Contributions to Implicit Higher-Order Spatial Sequence Learning Declines in Aging and Parkinson's Disease. Behavioral Neuroscience 127, 204-221.

Schmidt, R.A., Lee, T.D., Winstein, C., Wulf, G., Zelaznik, H.N., 2018. Motor control and learning: A behavioral emphasis. Human kinetics.

Sidaway, B., Ala, B., Baughman, K., Glidden, J., Cowie, S., Peabody, A., Roundy, D., Spaulding, J., Stephens, R., Wright, D.L., 2016. Contextual Interference Can Facilitate Motor Learning in Older Adults and in Individuals With Parkinson's Disease. Journal of Motor Behavior 48, 509-518.

Smiley-Oyen, A.L., Hall, S.A., Lowry, K.A., Kerr, J.P., 2012. Effects of Extensive Practice on Bradykinesia in Parkinson's Disease: Improvement, Retention and Transfer. Motor Control 16, 1-18.

Smiley-Oyen, A.L., Lowry, K.A., Emerson, Q.R., 2006. Learning and retention of movement sequences in Parkinson's disease. Movement Disorders 21, 1078-1087.

Smiley-Oyen, A.L., Worringham, C.J., Cross, C.L., 2003. Motor learning processes in a movement-scaling task in olivopontocerebellar atrophy and Parkinson's disease. Experimental Brain Research 152, 453-465.

Smith, J., Siegert, R.J., McDowall, J., 2001. Preserved implicit learning on both the serial reaction time task and artificial grammar in patients with Parkinson's disease. Brain and Cognition 45, 378-391.

Smith, J.G., McDowall, J., 2006. The implicit sequence learning deficit in patients with Parkinson's disease: A matter of impaired sequence integration? Neuropsychologia 44, 275-288.

Soliveri, P., Brown, R.G., Jahanshahi, M., Marsden, C.D., 1992. Effect of practice on performance of a skilled motor task in patients with Parkinson's disease. J Neurol Neurosurg Psychiatry 55, 454-460.

Sprengelmeyer, R., Canavan, A.G., Lange, H.W., Hömberg, V., 1995. Associative learning in degenerative neostriatal disorders: contrasts in explicit and implicit remembering between Parkinson's and Huntington's diseases. Mov Disord 10, 51-65.

Stefanova, E.D., Kostic, V.S., Ziropadja, L., Markovic, M., Ocic, G.G., 2000. Visuomotor skill learning on serial reaction time task in patients with early Parkinson's disease. Movement Disorders 15, 1095-1103.

Stephan, M.A., Meier, B., Zaugg, S.W., Kaelin-Lang, A., 2011. Motor sequence learning performance in Parkinson's disease patients depends on the stage of disease. Brain Cogn 75, 135-140.

Sternad, D., 2015. From theoretical analysis to clinical assessment and intervention: Three interactive motor skills in a virtual environment, 2015 International Conference on Virtual Rehabilitation (ICVR), pp. 265-272.

Thomas, V., Reymann, J.-M., Lieury, A., Allain, H., 1996. Assessment of procedural memory in Parkinson's disease. Progress in Neuro-Psychopharmacology & Biological Psychiatry 20, 641-650.

Tremblay, P.L., Bedard, M.A., Langlois, D., Blanchet, P.J., Lemay, M., Parent, M., 2010. Movement chunking during sequence learning is a dopamine-dependant process: a study conducted in Parkinson's disease. Experimental Brain Research 205, 375-385.

Tronson, N.C., Taylor, J.R., 2007. Molecular mechanisms of memory reconsolidation. Nature Reviews Neuroscience 8, 262-275.

Tzvi, E., Bey, R., Nitschke, M., Brüggemann, N., Classen, J., Münte, T.F., Krämer, U.M., Rumpf, J.J., 2021. Motor Sequence Learning Deficits in Idiopathic Parkinson's Disease Are Associated With Increased Substantia Nigra Activity. Front Aging Neurosci 13, 685168.

Vakil, E., Herishanu-Naaman, S., 1998. Declarative and procedural learning in Parkinson's disease patients having tremor or bradykinesia as the predominant symptom. Cortex 34, 611-620.

Van Ooteghem, K., Frank, J.S., Horak, F.B., 2017. Postural motor learning in Parkinson's disease: The effect of practice on continuous compensatory postural regulation. Gait & Posture 57, 299-304.

van Tilborg, I., Hulstijn, W., 2010. Implicit Motor Learning in Patients with Parkinson's and Alzheimer's Disease: Differences in Learning Abilities? Motor Control 14, 344-361.

Vandenbossche, J., Deroost, N., Soetens, E., Coomans, D., Spildooren, J., Vercruysse, S., Nieuwboer, A., Kerckhofs, E., 2013. Impaired Implicit Sequence Learning in Parkinson's Disease Patients With Freezing of Gait. Neuropsychology 27, 28-36.

Venkatakrishnan, A., Banquet, J.P., Burnod, Y., Contreras-vidal, J.L., 2011. Parkinson's disease differentially affects adaptation to gradual as compared to sudden visuomotor distortions. Human Movement Science 30, 760-769.

Verschueren, S.M., Swinnen, S.P., Dom, R., De Weerdt, W., 1997. Interlimb coordination in patients with Parkinson's disease: motor learning deficits and the importance of augmented information feedback. Exp Brain Res 113, 497-508.

Weiner, M.J., Hallett, M., Funkenstein, H.H., 1983. Adaptation to lateral displacement of vision in patients with lesions of the central nervous system. Neurology 33, 766.

Werheid, K., Ziessler, M., Nattkemper, D., von Cramon, D.Y., 2003. Sequence learning in Parkinson's disease: The effect of spatial stimulus-response compatibility. Brain and Cognition 52, 239-249.

Westwater, H., McDowall, J., Siegert, R., Mossman, S., Abernethy, D., 1998. Implicit learning in Parkinson's disease: Evidence from a verbal version of the serial reaction time task. Journal of Clinical and Experimental Neuropsychology 20, 413-418.

Wieczorek, D., Sławek, J., Białkowska, M., Dziadkiewicz, A., Sitek, E.J., 2011. Sequence learning and multi-step activity impairment in parkinson's disease. Acta Neuropsychologica 9, 303-312.

Wilkinson, L., Khan, Z., Jahanshahi, M., 2009. The role of the basal ganglia and its cortical connections in sequence learning: Evidence from implicit and explicit sequence learning in Parkinson's disease. Neuropsychologia 47, 2564-2573.

Worringham, C.J., Stelmach, G.E., 1990. Practice effects on the preprogramming of discrete movements in Parkinson's disease. J Neurol Neurosurg Psychiatry 53, 702-704.

Wu, T., Hallett, M., 2005. A functional MRI study of automatic movements in patients with Parkinson's disease. Brain 128, 2250-2259.

Wu, T., Hallett, M., 2008. Neural correlates of dual task performance in patients with Parkinson's disease. Journal of Neurology Neurosurgery and Psychiatry 79, 760-766.

Wu, T., Kansaku, K., Hallett, M., 2004. How Self-Initiated Memorized Movements Become Automatic: A Functional MRI Study. Journal of Neurophysiology 91, 1690-1698.

Wu, T., Liu, J., Zhang, H., Hallett, M., Zheng, Z., Chan, P., 2015. Attention to Automatic Movements in Parkinson's Disease: Modified Automatic Mode in the Striatum. Cerebral Cortex 25, 3330-3342.

Wu, T., Wang, L., Hallett, M., Li, K., Chan, P., 2010. Neural correlates of bimanual anti-phase and in-phase movements in Parkinson's disease. Brain 133, 2394-2409.

Zokaei, N., Sillence, A., Kienast, A., Drew, D., Plant, O., Slavkova, E., Manohar, S.G., Husain, M., 2020. Different patterns of short-term memory deficit in Alzheimer's disease, Parkinson's disease and subjective cognitive impairment. Cortex 132, 41-50.
